# Supplementary material for: Constructing Networks of Organelle Functional Modules in Arabidopsis
Source: PubMed Central journal article supplement — Curr Genomics. 2016 Oct;17(5):427–38. doi: 10.2174/1389202917666160726151048 (PMC5320545; doi:10.2174/1389202917666160726151048), 2016-10
Supplement: CG-17-427_SD1.pdf [file CG-17-427_SD1.pdf]

## Supplementary Material

### Constructing Networks of Organelle Functional Modules in Arabidopsis

Jiajie Peng<sup>a,b,c,#</sup>, Tao Wang<sup>b,#</sup>, Jianping Hu<sup>c,e</sup>, Yadong Wang<sup>a,b,\*</sup> and Jin Chen<sup>c,d,\*</sup>

<sup>a</sup>School of Computer Science and Technology, Harbin Institute of Technology Shenzhen Graduate School, Shenzhen, China; <sup>b</sup>School of Computer Science and Technology, Harbin Institute of Technology, Harbin, China; <sup>c</sup>Department of Energy Plant Research Lab, Michigan State University, East Lansing, USA; <sup>d</sup>Department of Computer Science and Engineering, Michigan State University, East Lansing, USA; <sup>e</sup>Department of Plant Biology, Michigan State University, East Lansing, USA

**Table S1.** The twelve selected organelle terms in the cellular component category of Gene Ontology for organelle gene labeling.

| Organelle             | GO Term ID | Number of Child Terms | Number of Gene Annotations |
|-----------------------|------------|-----------------------|----------------------------|
| Chloroplast           | GO:0009507 | 48                    | 3956                       |
| Endoplasmic Reticulum | GO:0005783 | 85                    | 542                        |
| Golgi Apparatus       | GO:0005794 | 37                    | 909                        |
| Mitochondria          | GO:0005739 | 83                    | 3561                       |
| Vacuole               | GO:0005773 | 68                    | 854                        |
| Nucleus               | GO:0005634 | 442                   | 9460                       |
| Glyoxysome            | GO:0009514 | 1                     | 1                          |
| Lysosome              | GO:0005764 | 26                    | 1                          |
| Peroxisome            | GO:0005777 | 20                    | 181                        |
| Proteasome            | GO:0000502 | 20                    | 53                         |
| Ribosome              | GO:0005840 | 171                   | 446                        |
| Vesicle               | GO:0031982 | 33                    | 53                         |

**Table S2.** The number of multi-location genes under different abiotic stress conditions.

| Pressures | #Source Genes | #Multi-location Genes | Percentage |
|-----------|---------------|-----------------------|------------|
| Wounding  | 1703          | 134                   | 0.08       |
| Drought   | 1337          | 106                   | 0.08       |
| Cold      | 4588          | 399                   | 0.09       |
| UV        | 4269          | 411                   | 0.10       |
| Salt      | 2491          | 252                   | 0.10       |
| Heat      | 3715          | 405                   | 0.11       |
| Osmotic   | 5462          | 683                   | 0.13       |

**Table S3. Cold**

| Chloroplast-9 | Chloroplast-8 | Chloroplast-7 | Chloroplast-6 | Chloroplast-5 | Chloroplast-3 | Chloroplast-2 | Chloroplast-1 | Module Name |
|---------------|---------------|---------------|---------------|---------------|---------------|---------------|---------------|-------------|
| AT3G19480     | AT5G22330     | AT1G65230     | AT2G14660     | AT1G11720     | AT1G62780     | AT1G6220      | AT5G38530     | Genes       |
| AT1G66630     | AT4G35630     | AT3G51420     | AT1G62730     | AT1G70410     | AT2G35370     | AT5G04140     | AT2G39470     |             |
| AT3G10230     | AT5G61820     | AT4G38830     | AT4G19390     | AT1G31170     | AT1G12330     | AT3G59090     | AT4G11410     |             |
| AT3G10420     | AT1G19150     | AT1G19150     | AT3G5450      | AT3G29240     | AT3G52750     | AT5G52280     | AT4G24810     |             |
| AT5G58870     | AT5G09840     | AT2G31670     | AT3G13720     | AT1G22630     | AT3G62410     | AT1G15960     | AT1G76730     |             |
| AT3G01180     | AT1G06380     | AT2G04790     | AT5G55610     | AT1G22140     | AT2G47910     | AT1G77670     | AT1G54350     |             |
| AT2G41040     | AT1G59870     | AT3G02690     | AT4G02370     | AT4G20010     | AT5G09820     | AT4G09350     | AT2G32480     |             |
| AT1G50250     | AT5G55200     | AT1G31230     | AT1G30960     | AT4G24080     | AT3G27890     | AT1G66730     | AT2G30390     |             |
| AT5G13770     | AT1G61570     | AT3G56040     | AT5G05220     | AT4G30993     | AT1G19670     | AT3G25690     | AT2G45740     |             |
| AT3G22890     | AT4G11600     | AT1G24020     | AT1G09780     | AT3G52720     | AT3G16250     | AT3G54290     | AT1G49750     |             |
| AT2G38780     | AT1G29940     | AT5G65490     | AT3G13537     | AT3G02050     | AT3G06230     | AT3G44720     | AT1G14150     |             |
| AT5G23060     | AT2G25530     | AT4G14510     | AT3G27300     | AT5G45410     | AT3G50920     | AT4G33580     | AT5G25630     |             |
| AT1G75100     | AT5G64640     | AT1G67080     | AT3G09440     | AT1G70580     | AT3G01440     | AT5G53170     | AT5G48910     |             |
| AT5G24830     | AT5G06530     | AT3G14210     | AT3G53460     | AT2G27810     | AT2G17240     | AT4G27600     | AT2G17972     |             |
| AT4G32770     | AT2G44510     | AT2G01590     | AT1G78930     | AT2G47450     | AT5G47420     | AT4G14680     | AT4G20840     |             |
| AT3G26570     | AT4G20890     | AT2G38760     | AT2G28900     | AT2G22330     | AT2G02810     | AT5G01920     | AT5G62140     |             |
| AT2G41120     | AT2G31955     | AT2G31790     | AT2G04350     | AT1G49975     | AT1G04980     | AT2G41770     | AT3G25130     |             |
| AT1G26560     | AT3G49240     | AT1G14900     | AT5G27380     | AT1G76080     | AT4G13670     | AT5G53580     | AT4G34830     |             |
| AT4G04830     | AT5G15810     | AT2G41720     | AT5G10100     | AT2G42690     | AT4G15440     | AT3G17470     | AT2G27820     |             |
| AT4G15530     | AT5G07010     | AT5G06340     | AT2G26150     | AT4G13050     | AT1G66970     | AT4G16410     | AT5G55740     |             |
| AT5G22510     | AT5G04600     | AT1G60690     | AT5G16380     | AT5G47970     | AT3G15095     | AT3G60620     | AT5G62840     |             |
| AT3G15850     | AT4G34950     | AT4G20760     | AT1G04945     | AT2G42490     | AT5G20935     | AT3G48200     | AT2G36835     |             |
| AT1G16720     | AT4G10760     | AT4G29750     | AT3G46970     | AT3G11750     | AT4G05390     | AT1G47128     | AT2G36830     |             |
| AT5G02120     | AT2G19860     | AT1G06510     | AT1G33070     | AT3G27020     | AT5G02940     | AT3G01120     | AT5G58260     |             |
|               | AT1G24310     | AT5G22860     | AT4G39730     | AT1G80830     | AT4G38060     | AT1G10960     | AT3G06510     |             |
|               | AT2G42530     | AT1G35340     | AT2G47840     | AT4G09650     | AT1G59960     | AT4G25700     | AT4G39950     |             |
|               |               | AT5G26820     | AT5G41670     | AT1G76100     | AT3G45050     | AT4G04830     | AT4G10470     |             |
|               |               |               | AT1G11220     | AT1G74530     | AT4G14100     | AT3G13070     | AT3G25805     |             |
|               |               |               | AT4G30840     | AT2G14750     | AT4G38910     | AT3G29200     | AT2G1950      |             |
|               |               |               |               | AT2G45960     | AT1G18170     | AT3G26320     | AT1G56190     |             |
|               |               |               |               |               | AT1G06560     | AT2G24280     | AT4G25720     |             |
|               |               |               |               |               | AT1G67930     | AT1G49380     | AT2G2765      |             |
|               |               |               |               |               |               | AT1G16080     | AT2G2260      |             |
|               |               |               |               |               |               | AT5G58770     | AT5G2780      |             |
|               |               |               |               |               |               | AT2G17220     | AT5G46390     |             |
|               |               |               |               |               |               | AT1G64680     | AT4G09620     |             |
|               |               |               |               |               |               | AT4G18570     | AT3G26085     |             |
|               |               |               |               |               |               |               | AT1G53280     |             |
|               |               |               |               |               |               |               | AT1G17745     |             |
|               |               |               |               |               |               |               | AT1G30530     |             |
|               |               |               |               |               |               |               | AT5G61790     |             |
|               |               |               |               |               |               |               | AT1G52260     |             |
|               |               |               |               |               |               |               | AT2G25830     |             |
|               |               |               |               |               |               |               | AT1G74070     |             |
|               |               |               |               |               |               |               | AT4G10300     |             |
|               |               |               |               |               |               |               | AT1G14345     |             |
|               |               |               |               |               |               |               | AT5G12170     |             |
|               |               |               |               |               |               |               | AT2G20830     |             |
|               |               |               |               |               |               |               | AT1G17100     |             |
|               |               |               |               |               |               |               | AT1G08250     |             |
|               |               |               |               |               |               |               | AT1G52590     |             |
|               |               |               |               |               |               |               | AT1G44920     |             |
|               |               |               |               |               |               |               | AT1G11700     |             |
|               |               |               |               |               |               |               | AT3G57190     |             |
|               |               |               |               |               |               |               | AT5G57930     |             |
|               |               |               |               |               |               |               | AT1G05140     |             |
|               |               |               |               |               |               |               | AT5G60400     |             |
|               |               |               |               |               |               |               | AT2G2290      |             |
|               |               |               |               |               |               |               | AT3G10840     |             |















| Nucleus-6  | Nucleus-5  | Nucleus-3 | Vacuole-18 | Vacuole-11 | Vacuole-8 | Vacuole-6 | Vacuole-4 |
|------------|------------|-----------|------------|------------|-----------|-----------|-----------|
| AT5G22840  | AT3G16840  | AT5G06710 | AT3G01290  | AT5G61820  | AT3G26590 | AT4G17340 | AT5G07440 |
| AT1G10270  | AT4G15770  | AT5G08130 | AT1G69840  | AT4G00320  | AT3G11700 | AT5G14430 | AT4G17550 |
| AT1G31660  | AT5G35910  | AT1G80110 | AT5G20230  | AT3G06530  | AT3G57330 | AT2G07680 | AT1G04430 |
| AT2G21660  | AT1G18850  | AT5G08620 | AT2G37970  | AT4G20890  | AT4G12420 | AT3G26520 | AT2G23150 |
| AT4G28450  | AT4G25320  | AT3G55380 | AT1G09070  | AT5G13750  | AT1G66200 | AT3G17040 | AT1G08920 |
| AT4G01560  | AT3G13330  | AT4G25520 |            | AT5G12140  | AT2G34660 | AT3G16240 | AT4G23630 |
| AT2G19385  | AT1G08580  | AT2G45980 |            | AT3G005630 | AT5G13930 | AT3G61430 | AT3G18440 |
| AT2G19380  | AT5G66120  | AT1G67310 |            |            | AT5G48870 | AT1G75220 | AT5G12010 |
| AT5G44170  | AT3G19840  | AT4G12070 |            |            |           | AT1G66470 | AT5G14570 |
| AT5G61380  | AT1G06380  | AT1G15580 |            |            |           | AT3G63420 | AT5G58070 |
| AT2G33730  | AT1G75670  | AT1G77180 |            |            |           | AT5G13640 | AT3G61260 |
| AT1G62740  | AT3G01560  | AT1G62570 |            |            |           | AT5G44020 | AT5G42570 |
| AT2G32250  | AT2G17560  | AT2G12550 |            |            |           |           | AT5G55400 |
| AT1G69260  | AT3G18600  | AT5G28150 |            |            |           |           | AT4G31140 |
| AT4G10620  | AT5G15750  | AT5G63320 |            |            |           |           | AT1G67360 |
| AT3G02990  | AT3G13940  | AT1G10410 |            |            |           |           | AT3G23810 |
| AT3G56260  | AT3G01540  | AT5G12010 |            |            |           |           |           |
| AT1G03530  | AT2G40780  | AT4G18390 |            |            |           |           |           |
| AT3G16810  | AT4G28200  | AT4G15130 |            |            |           |           |           |
| AT2G18900  | AT1G16810  | AT3G03920 |            |            |           |           |           |
| AT1G69070  | AT4G25340  | AT5G25660 |            |            |           |           |           |
| AT4G39670  | AT4G25630  | AT1G27910 |            |            |           |           |           |
| AT3G06530  | AT1G28060  | AT1G05805 |            |            |           |           |           |
| AT1G14060  | AT5G662190 | AT1G02270 |            |            |           |           |           |
| AT2G45900  | AT3G08060  | AT3G08710 |            |            |           |           |           |
| AT5G12220  | AT2G29540  | AT1G21660 |            |            |           |           |           |
| AT3G12860  | AT2G47990  | AT5G04670 |            |            |           |           |           |
| AT3G09480  | AT2G37990  | AT2G18915 |            |            |           |           |           |
| AT1G55170  | AT1G48920  | AT2G18350 |            |            |           |           |           |
| AT4G18650  | AT1G02330  | AT3G29575 |            |            |           |           |           |
| AT1G79150  | AT5G24840  | AT1G32870 |            |            |           |           |           |
| AT4G23540  | AT3G57150  | AT5G52310 |            |            |           |           |           |
| AT3G11964  | AT4G26750  | AT1G63910 |            |            |           |           |           |
| AT5G222380 | AT3G15460  | AT1G09350 |            |            |           |           |           |
| AT4G26600  | AT2G34570  | AT1G03250 |            |            |           |           |           |
| AT5G54910  | AT3G22660  | AT3G25870 |            |            |           |           |           |
| AT1G04945  | AT1G04780  | AT5G63370 |            |            |           |           |           |
| AT2G40080  | AT2G39250  | AT5G54930 |            |            |           |           |           |
| AT3G05630  | AT5G42060  | AT4G15420 |            |            |           |           |           |
| AT5G66540  | AT1G01420  | AT3G25730 |            |            |           |           |           |
| AT3G57940  | AT1G07360  | AT5G44210 |            |            |           |           |           |
| AT1G80040  | AT2G24500  | AT2G45660 |            |            |           |           |           |
| AT4G37090  | AT4G34910  | AT1G43860 |            |            |           |           |           |
| AT1G67920  | AT2G29210  | AT4G14900 |            |            |           |           |           |
| AT3G49210  | AT3G5620   | AT3G50960 |            |            |           |           |           |
| AT4G26080  | AT5G11240  | AT4G36900 |            |            |           |           |           |
| AT4G32720  | AT5G20160  | AT1G27760 |            |            |           |           |           |
|            | AT3G88660  | AT1G02860 |            |            |           |           |           |
|            |            | AT2G22080 |            |            |           |           |           |
|            |            | AT2G03820 |            |            |           |           |           |
|            |            | AT1G76580 |            |            |           |           |           |
|            |            | AT2G28510 |            |            |           |           |           |
|            |            | AT4G36920 |            |            |           |           |           |
|            |            | AT3G22260 |            |            |           |           |           |
|            |            | AT1G52930 |            |            |           |           |           |
|            |            | AT1G49720 |            |            |           |           |           |
|            |            | AT1G66770 |            |            |           |           |           |
|            |            | AT1G30330 |            |            |           |           |           |
|            |            | AT3G19470 |            |            |           |           |           |









| Peroxisome-4 | Peroxisome-3 |
|--------------|--------------|
| AT2G21660    | AT1G66550    |
| AT1G69270    | AT3G16910    |
| AT3G04460    | AT1G70580    |
| AT2G26230    | AT1G68010    |
| AT4G33905    | AT2G42490    |
|              | AT3G07560    |
|              |              |
|              |              |
|              |              |
|              |              |
|              |              |
|              |              |
|              |              |
|              |              |
|              |              |
|              |              |
|              |              |
|              |              |
|              |              |
|              |              |
|              |              |
|              |              |
|              |              |
|              |              |
|              |              |
|              |              |
|              |              |
|              |              |
|              |              |
|              |              |
|              |              |
|              |              |
|              |              |
|              |              |
|              |              |
|              |              |
|              |              |
|              |              |
|              |              |
|              |              |
|              |              |
|              |              |
|              |              |
|              |              |
|              |              |
|              |              |
|              |              |
|              |              |
|              |              |
|              |              |
|              |              |
|              |              |
|              |              |
|              |              |
|              |              |
|              |              |
|              |              |
|              |              |







| Nucleus-4 | Nucleus-1 | Vacuole-5 | Vacuole-4 | Vacuole-3 | Golgi_Apparatus-5 | Golgi_Apparatus-2 | Golgi_Apparatus-1 |
|-----------|-----------|-----------|-----------|-----------|-------------------|-------------------|-------------------|
| AT3G05800 | AT5G52760 | AT1G11840 | AT5G14120 | AT4G16260 | AT2G33570         | AT1G70090         | AT2G47770         |
| AT2G46400 | AT1G42990 | AT1G19670 | AT5G23210 | AT3G09260 | AT5G44130         | AT1G24170         | AT5G59220         |
| AT5G45630 | AT4G17230 | AT2G38760 | AT4G20260 | AT1G75040 | AT1G55850         | AT5G57560         | AT1G27200         |
| AT1G61340 | AT3G50260 | AT4G29210 | AT1G22740 | AT3G51860 | AT3G29810         | AT4G25810         | AT3G28340         |
| AT1G60190 | AT5G26920 | AT5G17220 | AT2G45170 | AT5G61820 | AT1G22530         | AT2G44500         | AT3G50760         |
| AT2G20880 | AT3G46110 | AT1G78680 | AT1G16390 | AT3G12500 |                   | AT1G35140         | AT1G29330         |
| AT2G46370 | AT1G77450 | AT1G31550 | AT3G07470 | AT3G01290 |                   | AT5G64260         | AT5G67210         |
| AT4G28140 | AT1G73805 | AT4G23600 | AT4G12420 | AT2G41100 |                   | AT1G66180         | AT2G23810         |
| AT3G63060 | AT5G63790 |           | AT1G72150 | AT3G14990 |                   | AT4G08950         | AT5G06320         |
| AT4G25490 | AT2G17040 |           |           | AT5G20230 |                   |                   | AT4G19120         |
| AT5G42380 | AT2G22080 |           |           |           |                   |                   | AT5G47910         |
| AT1G64380 | AT1G76650 |           |           |           |                   |                   | AT1G43910         |
| AT1G51700 | AT2G46510 |           |           |           |                   |                   | AT3G25600         |
| AT2G44840 | AT5G59550 |           |           |           |                   |                   | AT5G37770         |
|           | AT1G74430 |           |           |           |                   |                   | AT2G20370         |
|           | AT3G08720 |           |           |           |                   |                   | AT4G30280         |
|           | AT3G15210 |           |           |           |                   |                   | AT1G05170         |
|           | AT4G18880 |           |           |           |                   |                   |                   |
|           | AT3G16720 |           |           |           |                   |                   |                   |
|           | AT4G23810 |           |           |           |                   |                   |                   |
|           | AT5G52750 |           |           |           |                   |                   |                   |
|           | AT4G14365 |           |           |           |                   |                   |                   |
|           | AT5G62020 |           |           |           |                   |                   |                   |
|           | AT4G35110 |           |           |           |                   |                   |                   |





Table S3. Salt

| Chloroplast-9 | Chloroplast-8 | Chloroplast-6 | Chloroplast-4 | Chloroplast-3 | Chloroplast-2 | Chloroplast-1 | Module Name |
|---------------|---------------|---------------|---------------|---------------|---------------|---------------|-------------|
| AT1G05385     | AT4G26780     | AT3G48730     | AT4G00630     | ATCG00270     | AT5G45680     | AT1G65230     | Genes       |
| AT1G74070     | AT3G53460     | AT1G01080     | AT3G25110     | ATCG00490     | AT1G70410     | AT3G48420     |             |
| AT3G52720     | AT5G67510     | AT5G52520     | AT5G14780     | ATCG00120     | AT4G18370     | AT1G79850     |             |
| AT1G62750     | AT1G48460     | AT3G55400     | AT4G14090     | AT5G63420     | AT2G39470     | AT1G22630     |             |
| AT2G36835     | AT1G61740     | AT5G40610     | AT3G17820     | ATCG00730     | AT5G48220     | AT5G46420     |             |
| AT5G09820     | AT5G54510     | AT5G55740     | AT3G52180     | ATCG00130     | AT3G56650     | AT1G17650     |             |
| AT1G59720     | AT2G33210     | AT2G30695     | AT1G61800     | AT2G06850     | AT2G04790     | AT5G52960     |             |
| AT1G49975     | AT4G34138     | AT2G29180     | AT3G54400     | ATCG00590     | AT1G01390     | AT2G34620     |             |
| AT3G01440     | AT2G24120     | AT3G07670     | AT1G07040     | ATCG01080     | AT2G41680     | AT4G01310     |             |
| AT3G13120     | AT4G17090     | AT5G45040     | AT5G57560     | ATCG00680     | AT1G14150     | AT5G48790     |             |
| AT1G73655     | AT1G48570     | AT2G28000     | AT2G33150     | ATCG00210     | AT5G52100     | AT1G19150     |             |
| AT3G663510    | AT4G31210     | AT5G45930     | AT4G34950     | ATCG00140     | AT5G55220     | AT2G40100     |             |
| AT3G45050     | AT4G39260     | AT5G66470     | AT5G54060     | ATCG00150     | AT4G12830     | AT1G77490     |             |
| AT3G11750     | AT4G34740     | AT1G33810     | AT5G27280     | ATCG01120     | AT2G44920     | AT5G51720     |             |
| AT3G15850     | AT1G15510     | AT4G37040     | AT2G26150     | ATCG00430     | AT2G24090     | AT1G03630     |             |
|               | AT4G34770     | AT3G06730     | AT5G45550     | ATCG00500     | AT1G55370     | AT5G02120     |             |
|               | AT1G72150     | AT2G35500     | AT3G22840     | ATCG00330     | AT1G75690     | AT3G56040     |             |
|               |               | AT1G55490     | AT5G17380     | ATCG00190     | AT5G18660     | AT3G47070     |             |
|               |               | AT3G62910     | AT3G04000     | ATCG01110     | AT3G09210     | AT3G43540     |             |
|               |               |               | AT5G13490     | ATCG00420     | AT2G01590     | AT1G12800     |             |
|               |               |               | AT2G36750     | ATCG00600     | AT3G52150     | AT1G56500     |             |
|               |               |               | AT5G62530     | ATCG00040     | AT4G34090     | AT5G01650     |             |
|               |               |               | AT1G05560     | AT1G70200     | AT5G52970     | AT1G29070     |             |
|               |               |               | AT2G37770     | ATCG01070     | AT5G16715     | AT4G20070     |             |
|               |               |               |               | AT3G48500     | AT1G30520     | AT3G18890     |             |
|               |               |               |               | ATCG00280     | AT1G49380     | AT1G12250     |             |
|               |               |               |               | ATCG00660     | AT5G47190     | AT5G58260     |             |
|               |               |               |               | ATCG00065     | AT5G53580     | AT2G43560     |             |
|               |               |               |               |               | AT3G44890     | AT3G17040     |             |
|               |               |               |               |               | AT3G08920     | AT4G04350     |             |
|               |               |               |               |               | AT5G42670     | AT1G21500     |             |
|               |               |               |               |               | AT5G66530     | AT3G16250     |             |
|               |               |               |               |               | AT3G23700     | AT5G02160     |             |
|               |               |               |               |               | AT1G76450     | AT5G57170     |             |
|               |               |               |               |               | AT1G16880     | AT2G30170     |             |
|               |               |               |               |               | AT5G14660     | AT4G39970     |             |
|               |               |               |               |               | AT1G07320     | AT1G08550     |             |
|               |               |               |               |               | AT1G60160     | AT5G22620     |             |
|               |               |               |               |               | AT1G78180     | AT4G35250     |             |
|               |               |               |               |               | AT5G09650     | AT1G09340     |             |
|               |               |               |               |               | AT5G26820     | AT5G16400     |             |
|               |               |               |               |               |               | AT4G28025     |             |
|               |               |               |               |               |               | AT2G38140     |             |
|               |               |               |               |               |               | AT1G01790     |             |
|               |               |               |               |               |               | AT5G38520     |             |
|               |               |               |               |               |               | AT1G57770     |             |
|               |               |               |               |               |               | AT3G63140     |             |
|               |               |               |               |               |               | AT4G39710     |             |
|               |               |               |               |               |               | AT1G48350     |             |
|               |               |               |               |               |               | AT3G01060     |             |
|               |               |               |               |               |               | AT3G27160     |             |
|               |               |               |               |               |               | AT3G01480     |             |
|               |               |               |               |               |               | AT3G61080     |             |
|               |               |               |               |               |               | AT5G27560     |             |
|               |               |               |               |               |               | AT5G27290     |             |
|               |               |               |               |               |               | AT4G15510     |             |
|               |               |               |               |               |               | AT5G19220     |             |
|               |               |               |               |               |               | AT1G32990     |             |
|               |               |               |               |               |               | AT4G25080     |             |
|               |               |               |               |               |               | AT3G24430     |             |
|               |               |               |               |               |               | AT5G08650     |             |

















**Table S3. Wounding.**

| Chloroplast-15 | Chloroplast-14 | Chloroplast-12 | Chloroplast-11 | Chloroplast-9 | Chloroplast-6 | Chloroplast-5 | Chloroplast-1 | Module Name |
|----------------|----------------|----------------|----------------|---------------|---------------|---------------|---------------|-------------|
| AT1G77510      | AT2G34620      | AT1G14345      | AT5G61820      | AT1G19670     | ATCG00730     | AT3G55760     | AT1G20510     | Genes       |
| AT3G20820      | AT3G52720      | AT2G04790      | AT5G14780      | AT4G14680     | AT5G03350     | AT3G05660     | AT4G35600     |             |
| AT1G57630      | AT3G28080      | AT1G55370      | AT3G14990      | AT2G04400     | ATCG00210     | AT1G29395     | AT2G46500     |             |
| AT2G02810      | AT3G12610      | AT3G09050      | AT2G20670      | AT2G38760     | ATCG01120     | AT2G30870     | AT4G29670     |             |
| AT1G04980      | AT5G39210      | AT5G48360      | AT5G18670      | AT5G02940     | AT2G26560     | AT3G51450     | AT1G09940     |             |
| AT5G61790      | AT1G48620      | AT2G37080      | AT1G05560      | AT4G15440     | ATCG00190     | AT4G17090     | AT1G72520     |             |
|                |                | AT4G12980      | AT3G15450      | AT2G38750     | ATCG00600     | AT2G42540     | AT1G65390     |             |
|                |                |                |                | AT1G69370     | AT1G11700     | AT2G28900     | AT3G56090     |             |
|                |                |                |                | AT5G63450     | AT5G23020     | AT5G24420     | AT2G26530     |             |
|                |                |                |                |               | ATCG00330     | AT2G42530     | AT5G15190     |             |
|                |                |                |                |               | ATCG00660     | AT5G42650     | AT5G05300     |             |
|                |                |                |                |               |               |               | AT1G66090     |             |
|                |                |                |                |               |               |               | AT4G24380     |             |
|                |                |                |                |               |               |               | AT5G44070     |             |
|                |                |                |                |               |               |               | AT5G22630     |             |
|                |                |                |                |               |               |               | AT5G56980     |             |
|                |                |                |                |               |               |               | AT2G43320     |             |
|                |                |                |                |               |               |               | AT3G51970     |             |
|                |                |                |                |               |               |               | AT3G14050     |             |
|                |                |                |                |               |               |               | AT5G13390     |             |
|                |                |                |                |               |               |               | AT4G20830     |             |
|                |                |                |                |               |               |               | AT1G17420     |             |
|                |                |                |                |               |               |               | AT5G04870     |             |
|                |                |                |                |               |               |               | AT5G01730     |             |
|                |                |                |                |               |               |               | AT1G61890     |             |
|                |                |                |                |               |               |               | AT5G61210     |             |



| Nucleus-7 | Nucleus-3 | Nucleus-1 | Vacuole-1 | Golgi-Apparatus-6 | Golgi-Apparatus-4 | Golgi-Apparatus-2 | Golgi-Apparatus-1 |
|-----------|-----------|-----------|-----------|-------------------|-------------------|-------------------|-------------------|
| AT5G52760 | AT1G07000 | AT1G07870 | AT5G07440 | AT1G77510         | AT5G06720         | AT3G23820         | AT1G70090         |
| AT5G02670 | AT4G34390 | AT3G45640 | AT1G77510 | AT5G02490         | AT4G08950         | AT1G24070         | AT1G53840         |
| AT5G52750 | AT2G39650 | AT3G57930 | AT3G01290 | AT3G12580         | AT4G25810         | AT5G67210         | AT3G62720         |
| AT1G73805 | AT5G22250 | AT1G23710 | AT5G61820 | AT4G13410         | AT3G45970         | AT4G22330         | AT5G65470         |
| AT4G33050 | AT3G46930 | AT3G46620 | AT5G57655 | AT1G14360         | AT1G35140         | AT5G16190         | AT1G74380         |
| AT3G52430 | AT3G44260 | AT4G25490 | AT2G45170 |                   |                   | AT5G58070         | AT5G47910         |
| AT1G17140 | AT3G19580 | AT2G46400 | AT3G14990 |                   |                   | AT3G09440         | AT3G03050         |
| AT5G59210 | AT5G47910 | AT5G59820 | AT2G23150 |                   |                   | AT3G58790         | AT1G22180         |
| AT5G50740 | AT3G49530 | AT2G25250 | AT1G11260 |                   |                   | AT1G78240         | AT2G03240         |
| AT4G02800 | AT1G74450 | AT4G02200 | AT5G20230 |                   |                   | AT4G39840         | AT1G76970         |
| AT1G44900 | AT2G25460 | AT1G70740 | AT3G22200 |                   |                   | AT4G19120         | AT2G44500         |
| AT3G04030 | AT1G12610 | AT1G33760 | AT3G51860 |                   |                   | AT1G29330         | AT5G06620         |
| AT4G27230 | AT1G60190 | AT4G10270 | AT4G16260 |                   |                   | AT2G38360         | AT4G27720         |
| AT1G04020 | AT1G67530 | AT1G19210 | AT3G09260 |                   |                   | AT5G49900         | AT5G37770         |
| AT5G23420 | AT1G74930 | AT1G77640 | AT3G57260 |                   |                   | AT3G25140         | AT3G47960         |
|           | AT3G02840 | AT1G05710 | AT3G12500 |                   |                   | AT2G22900         | AT5G16910         |
|           | AT5G66640 | AT1G25400 | AT5G61790 |                   |                   | AT5G23850         | AT4G21560         |
|           | AT3G54000 | AT1G72240 | AT1G21250 |                   |                   |                   | AT5G16830         |
|           | AT1G59910 | AT2G40140 | AT3G62150 |                   |                   |                   | AT4G30996         |
|           | AT4G34410 | AT4G18880 | AT1G16390 |                   |                   |                   | AT2G02860         |
|           | AT1G63030 | AT1G63720 | AT4G27830 |                   |                   |                   | AT3G28340         |
|           | AT1G61340 | AT2G44840 |           |                   |                   |                   | AT4G39890         |
|           | AT5G24590 | AT2G41010 |           |                   |                   |                   | AT2G20370         |
|           | AT1G28370 | AT4G25470 |           |                   |                   |                   | AT4G30280         |
|           | AT5G42380 | AT1G66400 |           |                   |                   |                   | AT3G44190         |
|           | AT4G17490 | AT4G23810 |           |                   |                   |                   | AT3G27540         |



Table S3. Osmotic

| Chloroplast-8 | Chloroplast-7 | Chloroplast-5 | Chloroplast-4 | Chloroplast-3 | Chloroplast-2 | Chloroplast-1 | Module Name |
|---------------|---------------|---------------|---------------|---------------|---------------|---------------|-------------|
| AT2G24020     | AT5G63420     | AT1G06190     | AT3G55760     | AT1G70410     | AT1G49630     | AT3G01510     | Genes       |
| AT2G19730     | AT2G25840     | AT1G69200     | AT1G54130     | AT5G48220     | AT5G41860     | AT5G47840     |             |
| AT4G19830     | AT3G18390     | AT3G04260     | AT3G57020     | AT5G67510     | AT1G75330     | AT1G74880     |             |
| AT1G24610     | AT5G28500     | AT2G17972     | AT4G28390     | AT3G02660     | AT1G80560     | AT1G74730     |             |
| AT1G29700     | AT2G39140     | AT1G43560     | AT5G13800     | AT2G43030     | AT4G23940     | AT1G09210     |             |
| AT2G36160     | AT5G46290     | AT1G79560     | AT4G33780     | AT2G21370     | AT5G16390     | AT5G08650     |             |
| AT3G19480     | AT3G51870     | AT4G24750     | AT3G17810     | AT1G12800     | AT3G13120     | AT3G61870     |             |
| AT2G42740     | AT2G24120     | AT3G09200     | AT5G48370     | AT2G24090     | AT3G54210     | AT2G40100     |             |
| AT1G31817     | AT5G14100     | AT1G11430     | AT1G15960     | AT3G04790     | AT2G36885     | AT1G50450     |             |
| AT3G01790     | AT1G70070     | AT1G60600     | AT5G60460     | AT2G30695     | AT4G39460     | AT3G47070     |             |
| AT2G33370     | AT4G31210     | AT2G10940     | AT1G23070     | AT3G55330     | AT2G33450     | AT5G51100     |             |
| AT5G02160     | AT5G64580     | AT3G23940     | AT3G44880     | AT3G007670    | AT4G20960     | AT4G24770     |             |
| AT1G33290     | AT5G46580     | AT2G28605     | AT5G22860     | AT2G28000     | AT1G49750     | AT1G14150     |             |
| AT1G12230     | AT3G07430     | AT2G24060     | AT4G13010     | AT5G52970     | AT5G65220     | AT1G48520     |             |
| AT4G17740     | AT3G48500     | AT3G26710     | AT4G32920     | AT3G00430     | AT5G49030     | AT4G12830     |             |
| AT1G78370     | AT5G44020     | AT1G64790     | AT5G43260     | AT1G55490     | AT3G63510     | AT2G43750     |             |
| AT3G53580     | AT1G22700     | AT5G44340     | AT3G03440     | AT5G55520     | AT1G50575     | AT2G36250     |             |
| AT5G13100     | AT4G16390     | AT5G20980     | AT4G03200     | AT1G53240     | AT1G14810     | AT1G11860     |             |
| AT2G19940     | AT2G36230     | AT4G39040     | AT4G23885     | AT3G008920    | AT3G24430     | AT4G33520     |             |
| AT1G30520     | AT3G47450     | AT1G17560     | AT3G14360     | AT3G21200     | AT1G75350     | AT3G62410     |             |
| AT2G38140     | AT4G26670     | AT4G16410     | AT2G31350     | AT1G27450     | AT3G54650     | AT1G18060     |             |
| AT3G14110     | AT4G39120     | AT1G33810     | AT4G39210     | AT2G44050     | AT1G35680     | AT3G53900     |             |
| AT3G27740     | AT5G58250     | AT5G28750     | AT1G50020     | AT2G26930     | AT4G17600     | AT3G01550     |             |
| AT2G29690     | AT2G31170     | AT2G35040     | AT2G05710     | AT1G01080     | AT3G53130     | AT1G71500     |             |
| AT1G74040     | AT4G34740     | AT3G54090     | AT2G19860     | AT5G46420     | AT5G52520     | AT4G37930     |             |
| AT2G40550     | AT1G51100     | AT1G56050     | AT4G24450     | AT5G52100     | AT1G77670     | AT2G42130     |             |
| AT5G17790     | AT3G12930     | AT5G05740     | AT5G50720     | AT5G55220     | AT1G64510     | AT5G14740     |             |
| AT2G42220     | AT3G49560     | AT5G003350    | AT1G22370     | AT3G52960     | AT1G23360     | AT1G52230     |             |
| AT2G04530     | AT3G53460     | AT1G49975     | AT3G57680     | AT1G59990     | AT3G18890     | AT3G11630     |             |
| AT3G05810     | AT1G02150     | AT3G009210    | AT3G02360     | AT5G008050    | AT2G44920     | AT1G42970     |             |
| AT5G16290     | AT3G20230     | AT5G66470     | AT1G17745     | AT5G22340     | AT3G53560     | AT1G30530     |             |
| AT5G35360     | AT2G17240     | AT5G17710     | AT2G17500     | AT5G11450     | AT5G40950     | AT4G34090     |             |
|               | AT2G26550     | AT3G52380     | AT1G61800     | AT1G66970     | AT2G35410     | AT1G15980     |             |
|               | AT5G55740     | AT5G23310     | AT1G79450     | AT3G56160     | AT5G17870     | AT1G01790     |             |
|               | AT5G08280     | AT5G48790     | AT1G25520     | AT2G34640     | AT5G19600     | AT1G56340     |             |
|               |               | AT2G33430     | AT3G03900     | AT2G21385     | AT5G09760     | AT5G13280     |             |
|               |               | AT2G40490     | AT4G17840     | AT3G13070     | AT1G48350     | AT3G54050     |             |
|               |               | AT2G02740     | AT4G36210     | AT3G54400     | AT3G01480     | AT3G62030     |             |
|               |               | AT3G16240     | AT4G03030     | AT4G17560     | AT4G15510     | AT2G22250     |             |
|               |               | AT2G29180     | AT4G21470     | AT4G26555     | AT3G15190     | AT1G63610     |             |
|               |               | AT1G06950     | AT1G55280     | AT3G10690     | AT1G15390     | AT1G51110     |             |
|               |               | AT5G08610     | AT1G76180     | AT1G19920     | AT2G25830     | AT4G17340     |             |
|               |               | AT1G14030     | AT1G64810     | AT1G32550     | AT4G24830     | AT4G09650     |             |
|               |               | AT3G46740     | AT1G47128     | AT3G47650     | AT1G07320     | AT4G25080     |             |
|               |               |               | AT2G30550     | AT3G24506     | AT1G79850     | AT5G51720     |             |
|               |               |               | AT5G22510     | AT1G11870     | AT2G31270     | AT5G12470     |             |
|               |               |               | AT5G07010     | AT2G44650     | AT4G38970     | AT3G12780     |             |
|               |               |               | AT1G79260     | AT3G58610     | AT5G62840     | AT2G47940     |             |
|               |               |               | AT4G05590     | AT5G14910     | AT1G50900     | AT5G01220     |             |
|               |               |               | AT2G29070     | AT5G51110     | AT5G10920     | AT5G43750     |             |
|               |               |               |               | AT5G15320     | AT1G67700     | AT1G32080     |             |
|               |               |               |               | AT1G14410     | AT5G63310     | AT4G22890     |             |
|               |               |               |               | AT3G48730     | AT1G74970     | AT5G19760     |             |
|               |               |               |               | AT5G01590     | AT5G20720     | AT1G64770     |             |
|               |               |               |               | AT2G33180     | AT3G44890     | AT1G31330     |             |
|               |               |               |               | AT2G37660     | AT4G20760     | AT2G27680     |             |
|               |               |               |               | AT4G37040     | AT1G69740     | AT1G74070     |             |
|               |               |               |               | AT3G63190     | AT1G31860     | AT1G19150     |             |
|               |               |               |               | AT3G56910     | AT5G16250     | AT5G14320     |             |
|               |               |               |               | AT4G28660     | AT4G24930     | AT1G26560     |             |
|               |               |               |               | AT3G57560     | AT3G20390     | AT1G12900     |             |





| Mitochondria-4 | Mitochondria-3 | Mitochondria-2 | Mitochondria-1 | Chloroplast-31 | Chloroplast-24 | Chloroplast-23 | Chloroplast-18 |
|----------------|----------------|----------------|----------------|----------------|----------------|----------------|----------------|
| AT5G61810      | AT1G49630      | AT4G21580      | AT4G09550      | AT2G32140      | AT3G56710      | AT4G11600      | AT4G17550      |
| AT3G20300      | AT1G76405      | AT4G28390      | AT1G09210      | AT1G74440      | AT5G09590      | AT4G12300      | AT5G57040      |
| AT5G37550      | AT5G36950      | AT3G55640      | AT3G24570      | AT1G72520      | AT1G59870      | AT2G30870      | AT3G23920      |
| AT2G16710      | AT1G71460      | AT3G62650      | AT3G61870      | AT3G48090      | AT4G26070      | AT3G50480      | AT1G18870      |
| AT5G39950      | AT1G14810      | AT1G58180      | AT3G10230      | AT4G23810      | AT1G17420      | AT2G26560      | AT5G15190      |
| AT5G51740      | AT1G80720      | AT1G28960      | AT1G48520      |                | AT5G26030      | AT3G28940      | AT4G32770      |
| AT2G19860      | AT1G23360      | AT1G20560      | AT2G43750      |                | AT5G44070      | AT5G52810      | AT4G30490      |
| AT5G58690      | AT5G57440      | AT2G31350      | AT1G11860      |                |                | AT2G39210      | AT5G61820      |
| AT4G38060      | AT4G17740      | AT3G50830      | AT4G37930      |                |                |                | AT2G04350      |
| AT1G02390      | AT1G15390      | AT3G14430      | AT5G18660      |                |                |                |                |
| AT3G57090      | AT3G10690      | AT5G58070      | AT1G31580      |                |                |                |                |
| AT2G31955      | AT1G60770      | AT5G64250      | AT5G22620      |                |                |                |                |
| AT2G41380      | AT1G80270      | AT4G12410      | AT1G56340      |                |                |                |                |
| AT2G26230      | AT1G64880      | AT5G57815      | AT3G62030      |                |                |                |                |
| AT1G15110      | AT2G46470      | AT5G12390      | AT5G51720      |                |                |                |                |
| AT5G47580      | AT1G80080      | AT1G11170      | AT5G12470      |                |                |                |                |
| AT3G22370      | AT5G57590      | AT2G31570      | AT3G12780      |                |                |                |                |
| AT5G03190      | AT5G15200      | AT4G22270      | AT2G47940      |                |                |                |                |
| AT4G38540      | AT4G31700      | AT1G668140     | AT4G17360      |                |                |                |                |
| AT5G27520      | AT4G26300      | AT2G39725      | AT5G19760      |                |                |                |                |
| AT1G76960      | AT1G35580      | AT1G50940      | AT3G19480      |                |                |                |                |
| AT5G43430      | AT5G13120      | AT1G22890      | AT3G16010      |                |                |                |                |
|                | AT4G33760      | AT4G28085      | AT3G19720      |                |                |                |                |
|                | AT1G67630      | AT1G06570      | AT5G35630      |                |                |                |                |
|                |                | AT1G76590      | AT4G04350      |                |                |                |                |
|                |                | AT1G54120      | AT1G13270      |                |                |                |                |
|                |                | AT3G15780      | AT1G32470      |                |                |                |                |
|                |                | AT5G46180      | AT3G55250      |                |                |                |                |
|                |                | AT1G53580      | AT1G57770      |                |                |                |                |
|                |                | AT5G53350      | AT5G64770      |                |                |                |                |
|                |                | AT4G19040      | AT2G04039      |                |                |                |                |
|                |                | AT1G64810      | AT5G46110      |                |                |                |                |
|                |                | AT5G23460      | AT1G17650      |                |                |                |                |
|                |                | AT3G45300      | AT2G35370      |                |                |                |                |
|                |                | AT4G03410      | AT1G32220      |                |                |                |                |
|                |                | AT3G59280      | AT3G23990      |                |                |                |                |
|                |                | AT4G05590      | AT5G13140      |                |                |                |                |
|                |                |                | AT1G56190      |                |                |                |                |
|                |                |                | AT3G53580      |                |                |                |                |
|                |                |                | AT4G23290      |                |                |                |                |
|                |                |                | AT3G61080      |                |                |                |                |
|                |                |                | AT1G48030      |                |                |                |                |
|                |                |                | AT2G21170      |                |                |                |                |
|                |                |                | AT1G30520      |                |                |                |                |
|                |                |                | AT5G20720      |                |                |                |                |
|                |                |                | AT1G44000      |                |                |                |                |
|                |                |                | AT3G20390      |                |                |                |                |
|                |                |                | AT5G04140      |                |                |                |                |
|                |                |                | AT4G16155      |                |                |                |                |
|                |                |                | AT2G42770      |                |                |                |                |
|                |                |                | AT5G30510      |                |                |                |                |
|                |                |                | AT1G60550      |                |                |                |                |
|                |                |                | AT1G20070      |                |                |                |                |
|                |                |                | AT3G10570      |                |                |                |                |
|                |                |                | AT3G55400      |                |                |                |                |
|                |                |                | AT5G08040      |                |                |                |                |
|                |                |                | AT1G31920      |                |                |                |                |
|                |                |                | AT5G46800      |                |                |                |                |
|                |                |                | AT3G59760      |                |                |                |                |
|                |                |                | AT3G11945      |                |                |                |                |
|                |                |                | AT5G13630      |                |                |                |                |









| Nucleus-2 | Nucleus-1  | Vacuole-13 | Vacuole-12 | Vacuole-10 | Vacuole-9 | Vacuole-8 | Vacuole-6 |
|-----------|------------|------------|------------|------------|-----------|-----------|-----------|
| AT5G40480 | AT4G12600  | AT3G12580  | AT3G54960  | AT3G27280  | AT5G09590 | AT3G10410 | AT1G09210 |
| AT2G29570 | AT2G25100  | AT5G13750  | AT3G22060  | AT2G37190  | AT1G59870 | AT1G80310 | AT4G17340 |
| AT2G44120 | AT3G07110  | AT5G45130  | AT4G08770  | AT2G36160  | AT5G67480 | AT5G52450 | AT5G19760 |
| AT3G11110 | AT3G22231  | AT5G27150  | AT5G01820  | AT1G07770  | AT1G64330 | AT4G23600 | AT5G09660 |
| AT2G37190 | AT2G44640  | AT3G05630  | AT1G09070  | AT3G49910  | AT4G02370 | AT4G39730 | AT1G19670 |
| AT3G12390 | AT3G48490  |            | AT2G47800  | AT5G15200  | AT3G62150 | AT1G16010 | AT1G52280 |
| AT3G54750 | AT5G08330  |            |            | AT4G27090  | AT3G01290 | AT5G03240 | AT1G11580 |
| AT5G15330 | AT4G37740  |            |            |            | AT1G62290 | AT4G16190 | AT1G31550 |
| AT3G23080 | AT1G29250  |            |            |            |           |           | AT3G14210 |
| AT1G68190 | AT2G26040  |            |            |            |           |           | AT1G09340 |
| AT5G59870 | AT3G09200  |            |            |            |           |           | AT3G53420 |
| AT4G25630 | AT1G14440  |            |            |            |           |           | AT5G55990 |
| AT4G32330 | AT3G44590  |            |            |            |           |           |           |
| AT2G37790 | AT1G33040  |            |            |            |           |           |           |
| AT1G30690 | AT2G29510  |            |            |            |           |           |           |
| AT5G18620 | AT3G43920  |            |            |            |           |           |           |
| AT3G60770 | AT4G00810  |            |            |            |           |           |           |
| AT4G02060 | AT1G48610  |            |            |            |           |           |           |
| AT3G27360 | AT2G47610  |            |            |            |           |           |           |
| AT2G27720 | AT3G04920  |            |            |            |           |           |           |
| AT1G53050 | AT2G28600  |            |            |            |           |           |           |
| AT5G06700 | AT1G69770  |            |            |            |           |           |           |
| AT5G11240 | AT1G48630  |            |            |            |           |           |           |
| AT2G43650 | AT3G09630  |            |            |            |           |           |           |
| AT1G75250 | AT2G39460  |            |            |            |           |           |           |
| AT5G66740 | AT4G17810  |            |            |            |           |           |           |
| AT2G35605 | AT4G28310  |            |            |            |           |           |           |
| AT2G18740 | AT2G32060  |            |            |            |           |           |           |
| AT5G20630 | AT1G64790  |            |            |            |           |           |           |
| AT3G17040 | AT1G17880  |            |            |            |           |           |           |
| AT4G27430 | AT5G02870  |            |            |            |           |           |           |
| AT2G33370 | AT1G16060  |            |            |            |           |           |           |
| AT4G34670 | AT4G27080  |            |            |            |           |           |           |
| AT2G28450 | AT1G67430  |            |            |            |           |           |           |
| AT1G01100 | AT1G26880  |            |            |            |           |           |           |
| AT4G26110 | AT3G57470  |            |            |            |           |           |           |
| AT3G45980 | AT5G39740  |            |            |            |           |           |           |
| AT1G08880 | AT5G53900  |            |            |            |           |           |           |
| AT1G14685 | AT3G18130  |            |            |            |           |           |           |
| AT5G59080 | AT5G665360 |            |            |            |           |           |           |
| AT2G38810 | AT2G34640  |            |            |            |           |           |           |
| AT2G24490 | AT2G27710  |            |            |            |           |           |           |
| AT5G10390 | AT2G21650  |            |            |            |           |           |           |
| AT1G10490 | AT5G09240  |            |            |            |           |           |           |
| AT4G25890 | AT5G665440 |            |            |            |           |           |           |
| AT5G22880 | AT4G17390  |            |            |            |           |           |           |
| AT2G16440 | AT1G72370  |            |            |            |           |           |           |
| AT1G52930 | AT5G20160  |            |            |            |           |           |           |
| AT1G67320 | AT5G16130  |            |            |            |           |           |           |
| AT3G54560 | AT5G08620  |            |            |            |           |           |           |
| AT3G02080 | AT4G36540  |            |            |            |           |           |           |
| AT3G50070 | AT3G09500  |            |            |            |           |           |           |
| AT1G78370 | AT2G31890  |            |            |            |           |           |           |
| AT3G29280 | AT5G61170  |            |            |            |           |           |           |
| AT1G54690 | AT5G08180  |            |            |            |           |           |           |
| AT5G41880 | AT3G18600  |            |            |            |           |           |           |
| AT1G63980 | AT5G56950  |            |            |            |           |           |           |
| AT3G51270 | AT4G00100  |            |            |            |           |           |           |
| AT1G49480 | AT1G20220  |            |            |            |           |           |           |
| AT2G40150 | AT2G02480  |            |            |            |           |           |           |
| AT5G38140 | AT1G69700  |            |            |            |           |           |           |











**Table S3. Heat.**

| Chloroplast-8 | Chloroplast-7 | Chloroplast-6 | Chloroplast-5 | Chloroplast-3 | Chloroplast-2 | Chloroplast-1 | Module Name |
|---------------|---------------|---------------|---------------|---------------|---------------|---------------|-------------|
| AT1G31190     | ATCG00270     | AT1G48090     | AT4G05530     | AT1G74880     | AT1G11720     | AT5G44650     | Genes       |
| AT5G07460     | AT1G13700     | AT5G53460     | AT3G28080     | AT5G22330     | AT4G18370     | AT4G10280     |             |
| AT2G32640     | AT4G10250     | AT1G78370     | AT5G66230     | AT4G13250     | AT3G28130     | AT2G45990     |             |
| AT5G03630     | AT5G61440     | AT2G43100     | AT1G09390     | AT5G67510     | AT2G40840     | AT4G20960     |             |
| AT4G34730     | AT4G13830     | AT1G21440     | AT4G34450     | AT1G80270     | AT5G38520     | AT1G12900     |             |
| AT2G30870     | AT5G57560     | AT1G56500     | AT3G23890     | AT2G19720     | AT1G09780     | AT3G50270     |             |
| AT1G74030     | AT4G34138     | AT5G64290     | AT5G14100     | AT1G30960     | AT3G25740     | AT4G14570     |             |
| AT3G54640     | AT5G64260     | AT3G16470     | AT1G49975     | AT3G03920     | AT3G43600     | AT5G55610     |             |
| AT1G03780     | ATCG00020     | ATCG00760     | AT4G39120     | AT3G15357     | AT4G03200     | AT3G19720     |             |
| AT5G67030     | AT5G54300     | ATCG00770     | AT4G33000     | AT5G46920     | AT1G54350     | AT3G62410     |             |
| AT4G39730     | AT1G18740     | AT3G59760     | AT3G63160     | AT1G31010     | AT1G31230     | AT1G10310     |             |
| AT5G42070     | ATCG01050     | AT3G09260     | AT3G15730     | AT3G06530     | AT1G12800     | AT5G25770     |             |
| AT4G28660     | ATCG01060     | AT2G46910     | AT1G64650     | AT3G56330     | AT2G48120     | AT4G36210     |             |
| AT5G35970     | AT2G34590     | AT1G73470     | AT3G13720     | AT2G34520     | AT5G02940     | AT3G09050     |             |
| AT1G35720     | ATCG01070     | AT1G17745     | AT3G09250     | AT1G28530     | AT5G12170     | AT2G30860     |             |
|               | ATCG00280     | AT1G29700     | AT1G66200     | AT5G09770     | AT4G29670     | AT2G04400     |             |
|               |               | ATCG00660     | AT3G27300     | AT2G05120     | AT5G43745     | AT3G09210     |             |
|               |               | AT5G40390     | AT4G04850     | AT2G21660     | AT5G20980     | AT1G65420     |             |
|               |               |               |               | AT1G29940     | AT1G70580     | AT2G28900     |             |
|               |               |               |               | AT5G20930     | AT1G75210     | AT4G33010     |             |
|               |               |               |               | AT1G15510     | AT3G07670     | AT2G26550     |             |
|               |               |               |               | AT2G20020     | AT3G01060     | AT1G70070     |             |
|               |               |               |               | AT1G04945     | AT3G09580     | AT2G17265     |             |
|               |               |               |               | AT4G10760     | AT1G22410     | AT5G27380     |             |
|               |               |               |               | AT1G53460     | AT3G61540     | AT1G54410     |             |
|               |               |               |               | AT1G61570     | AT4G00490     | AT3G45140     |             |
|               |               |               |               | AT2G31840     | AT3G49680     | AT3G15710     |             |
|               |               |               |               | AT2G23470     | AT1G69830     | AT5G48370     |             |
|               |               |               |               | AT1G48240     | AT4G23940     | AT5G26570     |             |
|               |               |               |               | AT4G30840     | AT1G03310     | AT5G44520     |             |
|               |               |               |               | AT2G35720     | AT4G22840     | AT3G23070     |             |
|               |               |               |               |               | AT4G30310     | AT3G16290     |             |
|               |               |               |               |               | AT4G13430     | AT3G01120     |             |
|               |               |               |               |               | AT5G49030     | AT3G46970     |             |
|               |               |               |               |               | AT5G63060     | AT1G27680     |             |
|               |               |               |               |               | AT4G21210     | AT3G09150     |             |
|               |               |               |               |               | AT3G19490     | AT1G29395     |             |
|               |               |               |               |               | AT5G63980     | AT3G55920     |             |
|               |               |               |               |               |               | AT1G68680     |             |
|               |               |               |               |               |               | AT2G13560     |             |
|               |               |               |               |               |               | AT5G03900     |             |
|               |               |               |               |               |               | AT4G35760     |             |
|               |               |               |               |               |               | AT2G29690     |             |
|               |               |               |               |               |               | AT3G16230     |             |

















| Nucleus-3  | Nucleus-2 | Nucleus-1 | Vacuole-12 | Vacuole-10 | Vacuole-8 | Vacuole-7 | Vacuole-6 |
|------------|-----------|-----------|------------|------------|-----------|-----------|-----------|
| AT5G56910  | AT3G57000 | AT5G09860 | AT1G79410  | AT2G45170  | AT1G69840 | AT2G42740 | AT5G09590 |
| AT1G51200  | AT3G23620 | AT3G53730 | AT5G12010  | AT4G16500  | AT1G11260 | AT1G27400 | AT1G79550 |
| AT3G15540  | AT5G52380 | AT4G18120 | AT4G12730  | AT3G61180  | AT5G14120 | AT3G53740 | AT2G36830 |
| AT5G13680  | AT1G18850 | AT4G11080 | AT4G23200  | AT5G15350  | AT4G39090 | AT2G20450 | AT5G18100 |
| AT2G34357  | AT1G63780 | AT5G43900 | AT3G21690  | AT5G67480  | AT5G06320 | AT5G27850 | AT5G58070 |
| AT1G605410 | AT1G53200 | AT1G29980 | AT3G62150  | AT4G21980  | AT2G41100 | AT5G15160 | AT3G12580 |
| AT1G31970  | AT1G31660 | AT1G21700 | AT5G44670  | AT1G69070  | AT5G20230 | AT4G37190 | AT1G67360 |
| AT1G02870  | AT4G01560 | AT4G34050 |            |            | AT3G62550 | AT1G34030 | AT2G47730 |
| AT1G54770  | AT2G19385 | AT5G18590 |            |            |           | AT3G04920 | AT5G02500 |
| AT1G65700  | AT5G06550 | AT3G16060 |            |            |           |           | AT3G03520 |
| AT3G06530  | AT4G13750 | AT4G15130 |            |            |           |           |           |
| AT5G52470  | AT4G25730 | AT3G27310 |            |            |           |           |           |
| AT2G04530  | AT5G53770 | AT5G11950 |            |            |           |           |           |
| AT5G60040  | AT5G15750 | AT1G13650 |            |            |           |           |           |
| AT3G44750  | AT5G64680 | AT3G22780 |            |            |           |           |           |
| AT4G22380  | AT2G18900 | AT3G26090 |            |            |           |           |           |
| AT5G62290  | AT2G40360 | AT2G22740 |            |            |           |           |           |
| AT2G05120  | AT5G06110 | AT3G45980 |            |            |           |           |           |
| AT4G27010  | AT1G30240 | AT1G43620 |            |            |           |           |           |
| AT4G38440  | AT2G44510 | AT4G00750 |            |            |           |           |           |
| AT2G31970  | AT1G51380 | AT4G02860 |            |            |           |           |           |
| AT4G29510  | AT3G13230 | AT1G75990 |            |            |           |           |           |
| AT1G18800  | AT2G47990 | AT5G52310 |            |            |           |           |           |
| AT2G23930  | AT5G15550 | AT3G60450 |            |            |           |           |           |
| AT5G16610  | AT4G28450 | AT1G01730 |            |            |           |           |           |
| AT1G52830  | AT4G15770 | AT4G28610 |            |            |           |           |           |
| AT5G16750  | AT3G09720 | AT3G16830 |            |            |           |           |           |
| AT1G56110  | AT5G62440 | AT1G10900 |            |            |           |           |           |
| AT1G74560  | AT5G24840 | AT4G02680 |            |            |           |           |           |
| AT4G30840  | AT2G32600 | AT2G47980 |            |            |           |           |           |
| AT1G15790  | AT2G45730 | AT1G06760 |            |            |           |           |           |
| AT3G46920  | AT4G15850 | AT4G37210 |            |            |           |           |           |
|            | AT4G37090 | AT2G45660 |            |            |           |           |           |
|            | AT5G11240 | AT2G04660 |            |            |           |           |           |
|            | AT3G10530 | AT5G47970 |            |            |           |           |           |
|            | AT3G25940 | AT5G14460 |            |            |           |           |           |
|            | AT3G58660 | AT2G33860 |            |            |           |           |           |
|            |           | AT2G2170  |            |            |           |           |           |
|            |           | AT4G16880 |            |            |           |           |           |
|            |           | AT5G09250 |            |            |           |           |           |
|            |           | AT4G27240 |            |            |           |           |           |
|            |           | AT1G15660 |            |            |           |           |           |
|            |           | AT5G56270 |            |            |           |           |           |
|            |           | AT1G51680 |            |            |           |           |           |











Table S3. UV.

| Chloroplast-7 | Chloroplast-6 | Chloroplast-5 | Chloroplast-4 | Chloroplast-3 | Chloroplast-2 | Chloroplast-1 | Module Name |
|---------------|---------------|---------------|---------------|---------------|---------------|---------------|-------------|
| AT1G72320     | AT4G17600     | AT1G26340     | AT2G40840     | AT1G31690     | ATCG00270     | AT4G20130     | Genes       |
| AT1G29940     | AT3G06980     | AT5G14930     | AT3G53470     | AT1G65230     | ATCG00490     | AT4G30720     |             |
| AT4G35630     | AT4G25080     | AT4G03320     | AT1G22630     | AT3G48420     | ATCG01010     | AT1G52220     |             |
| AT5G15090     | AT1G32550     | AT4G33070     | AT2G01870     | AT3G26710     | ATCG00650     | AT5G63420     |             |
| AT3G10050     | AT4G15110     | AT1G74710     | AT1G20010     | AT2G39470     | ATCG00730     | AT3G53460     |             |
| AT1G48850     | AT3G15110     | AT4G00550     | AT1G23400     | AT1G62780     | ATCG00130     | AT5G51820     |             |
| AT1G06380     | AT4G38160     | AT1G79550     | AT4G25910     | AT5G48790     | ATCG00640     | AT5G58250     |             |
| AT5G55610     | AT4G24750     | AT5G03290     | AT1G20020     | AT1G19150     | ATCG00120     | AT3G46630     |             |
| AT3G20330     | AT5G66230     | AT2G30870     | AT5G09820     | AT5G38520     | AT4G34830     | AT4G18480     |             |
| AT1G30960     | AT2G30695     | AT5G51070     | AT1G70820     | AT1G14345     | ATCG00590     | AT2G21370     |             |
| AT5G55200     | AT2G37660     | AT1G74310     | AT2G29630     | AT3G56650     | ATCG01080     | AT1G51080     |             |
| AT3G15352     | AT3G16250     | AT5G52810     | AT5G64860     | AT4G33470     | ATCG00680     | AT3G14930     |             |
| AT5G46920     | AT4G19100     | AT1G00945     | AT2G45960     | AT1G14150     | ATCG00170     | AT2G40490     |             |
| AT1G31010     | AT5G45040     | AT5G27380     | AT4G18240     | AT1G20810     | ATCG00210     | AT3G18680     |             |
| AT2G04400     | AT3G25805     | AT1G19250     | AT1G08550     | AT5G62840     | ATCG00140     | AT3G18390     |             |
| AT3G49240     | AT5G57030     | AT2G13810     | AT4G18740     | AT5G08050     | ATCG00780     | AT1G21600     |             |
| AT2G45290     | AT1G55370     | AT5G61790     | AT2G28900     | AT5G18660     | ATCG00120     | AT1G50900     |             |
| AT5G67630     | AT5G03940     | AT3G28940     | AT5G42030     | AT3G55330     | ATCG00430     | AT4G26670     |             |
| AT5G13280     | AT4G24090     | AT3G48890     | AT1G35420     | AT1G66430     | ATCG00150     | AT3G20230     |             |
| AT1G80270     | AT5G52970     | AT2G30550     | AT1G10760     | AT3G01440     | ATCG00790     | AT3G09050     |             |
| AT2G16460     | AT3G12930     | AT2G25140     | AT4G09020     | AT2G01590     | ATCG00300     | AT1G74850     |             |
| AT2G35720     | AT5G62790     | AT2G23890     | AT3G03980     | AT1G15980     | ATCG00520     | AT2G06850     |             |
|               | AT1G68590     | AT2G35980     | AT5G26570     | AT2G26550     | ATCG00530     | AT1G49975     |             |
|               | AT1G08520     | AT5G64510     | AT5G57170     | AT5G01920     | ATCG00180     | AT1G60600     |             |
|               | AT4G17560     | AT1G004810    | AT3G32930     | AT3G53130     | ATCG00360     | AT3G63170     |             |
|               |               | AT4G26970     | AT3G46970     | AT1G45474     | ATCG00500     | AT5G52960     |             |
|               |               | AT5G17990     | AT5G13730     | AT3G15095     | ATCG00190     | AT5G52440     |             |
|               |               |               | AT5G08410     | AT2G30170     | ATCG01110     | AT3G52150     |             |
|               |               |               |               | AT5G53580     | ATCG00420     | AT5G38290     |             |
|               |               |               |               | AT5G27290     | ATCG00600     | AT5G45930     |             |
|               |               |               |               | AT3G54050     | ATCG01060     | AT3G55250     |             |
|               |               |               |               | AT5G58260     | ATCG00040     | AT2G39140     |             |
|               |               |               |               | AT1G54500     | ATCG00510     | AT5G23060     |             |
|               |               |               |               | AT1G76450     | ATCG01070     | AT1G33810     |             |
|               |               |               |               | AT4G33500     | AT3G56160     | AT3G60370     |             |
|               |               |               |               | AT5G59250     | AT5G05270     | AT4G15510     |             |
|               |               |               |               | AT3G10060     | ATCG00280     | AT2G35500     |             |
|               |               |               |               | AT5G43750     | ATCG00660     | AT3G12700     |             |
|               |               |               |               |               | ATCG00065     | AT2G25800     |             |
|               |               |               |               |               | ATCG00710     | AT4G26370     |             |
|               |               |               |               |               |               | AT2G26900     |             |
|               |               |               |               |               |               | AT5G08280     |             |
|               |               |               |               |               |               | AT5G16250     |             |
|               |               |               |               |               |               | AT2G33255     |             |













| Nucleus-5 | Nucleus-3  | Nucleus-2 | Nucleus-1 | Vacuole-20 | Vacuole-18 | Vacuole-17 | Vacuole-13 |
|-----------|------------|-----------|-----------|------------|------------|------------|------------|
| AT1G10270 | AT5G61560  | AT5G14050 | AT2G43650 | AT5G14120  | AT4G17140  | AT3G13000  | AT1G77510  |
| AT5G62480 | AT3G14700  | AT5G55920 | AT5G60960 | AT2G40420  | AT4G17340  | AT3G16240  | AT2G47470  |
| AT1G71530 | AT3G10500  | AT1G72320 | AT3G57000 | AT1G20840  | AT3G16850  | AT1G62290  | AT4G24190  |
| AT5G12480 | AT2G47730  | AT4G15770 | AT3G22660 | AT2G41560  | AT1G22740  | AT2G45350  | AT2G00510  |
| AT5G15090 | AT3G14990  | AT1G73490 | AT3G23620 | AT1G72150  | AT3G10410  | AT1G27480  | AT3G57260  |
| AT4G17720 | AT1G10170  | AT1G18850 | AT1G52160 |            |            | AT5G55990  | AT5G13750  |
| AT1G68620 | AT3G50910  | AT5G61770 | AT4G03180 |            |            |            | AT2G29120  |
| AT3G19130 | AT1G05880  | AT3G24080 | AT1G63780 |            |            |            | AT1G21750  |
| AT3G26090 | AT2G20320  | AT5G06110 | AT3G10530 |            |            |            |            |
| AT1G15420 | AT4G36030  | AT4G28450 | AT1G08580 |            |            |            |            |
| AT4G04800 | AT3G11850  | AT4G01560 | AT3G15460 |            |            |            |            |
| AT5G12220 | AT1G005710 | AT1G79150 | AT3G62310 |            |            |            |            |
| AT3G19360 | AT3G46930  | AT2G31410 | AT3G12340 |            |            |            |            |
| AT3G02555 | AT4G14220  | AT5G24660 | AT1G50920 |            |            |            |            |
| AT3G12860 | AT4G16680  | AT3G56990 | AT2G29540 |            |            |            |            |
| AT4G12120 | AT1G32870  | AT5G06550 | AT5G08180 |            |            |            |            |
| AT3G61630 | AT1G12200  | AT3G57150 | AT2G34260 |            |            |            |            |
| AT5G23710 | AT2G41630  | AT5G64420 | AT3G18600 |            |            |            |            |
| AT5G54910 | AT2G27580  | AT4G05410 | AT5G15750 |            |            |            |            |
| AT4G22530 | AT2G30140  | AT3G28930 | AT4G04940 |            |            |            |            |
| AT2G47000 | AT3G09440  | AT1G06380 | AT3G21540 |            |            |            |            |
| AT3G55620 | AT4G01870  | AT5G38890 | AT3G55510 |            |            |            |            |
| AT3G58660 | AT2G40180  | AT1G60850 | AT1G14300 |            |            |            |            |
|           | AT5G13080  | AT5G60030 | AT1G31660 |            |            |            |            |
|           | AT2G26150  | AT1G22200 | AT5G02820 |            |            |            |            |
|           | AT2G46310  | AT3G13940 | AT4G25630 |            |            |            |            |
|           | AT3G20410  | AT1G06720 | AT1G30240 |            |            |            |            |
|           | AT4G31860  | AT2G40700 | AT3G44750 |            |            |            |            |
|           | AT2G38340  | AT2G18900 | AT2G44510 |            |            |            |            |
|           | AT3G54520  | AT1G69070 | AT1G51380 |            |            |            |            |
|           | AT1G61140  | AT5G15550 | AT3G01160 |            |            |            |            |
|           | AT1G03740  | AT2G18220 | AT1G15440 |            |            |            |            |
|           | AT5G66010  | AT1G14060 | AT1G80750 |            |            |            |            |
|           | AT3G11020  | AT5G14520 | AT5G67240 |            |            |            |            |
|           | AT5G55600  | AT1G04945 | AT3G60360 |            |            |            |            |
|           | AT1G54090  | AT3G13230 | AT2G27840 |            |            |            |            |
|           | AT5G65140  | AT1G01060 | AT1G53645 |            |            |            |            |
|           | AT3G57700  | AT5G67630 | AT1G43860 |            |            |            |            |
|           | AT5G02490  | AT3G05060 | AT4G29510 |            |            |            |            |
|           |            | AT2G47990 | AT5G57120 |            |            |            |            |
|           |            | AT4G26600 | AT4G02400 |            |            |            |            |
|           |            | AT5G10520 | AT2G37990 |            |            |            |            |
|           |            | AT3G25230 | AT1G23280 |            |            |            |            |
|           |            | AT1G31870 | AT1G48920 |            |            |            |            |















**Table S4.** The properties of mixed networks under drought condition when HT was fixed at 0.98 and LT was changed from 0.8 to 0.95 by 0.05.

| HT=0.98,LT= | #Node | #Edge | Density     |
|-------------|-------|-------|-------------|
| 0.80        | 892   | 4484  | 0.011283739 |
| 0.85        | 857   | 3635  | 0.009910141 |
| 0.90        | 751   | 2411  | 0.00856103  |
| 0.95        | 550   | 1236  | 0.008186786 |

**Table S5.** The properties of mixed networks under drought condition when LT was fixed at 0.95 and HT was changed from 0.96 to 0.99 by 0.01.

| LT=0.95,HT= | #Node | #Edge | Density     |
|-------------|-------|-------|-------------|
| 0.96        | 768   | 2259  | 0.007669899 |
| 0.97        | 678   | 1645  | 0.007167662 |
| 0.98        | 550   | 1236  | 0.008186786 |
| 0.99        | 446   | 936   | 0.009432156 |

**Table S6.** The properties of mixed networks under drought condition when LT was fixed at 0.8 and HT was changed from 0.85 to 0.98.

| LT=0.8,HT= | #Node | #Edge | Density     |
|------------|-------|-------|-------------|
| 0.85       | 1007  | 19931 | 0.039348813 |
| 0.9        | 971   | 12009 | 0.025500334 |
| 0.95       | 908   | 5795  | 0.014073117 |
| 0.98       | 892   | 4484  | 0.011283739 |

**Table S7.** The number of Chloroplast genes remain in our network v.s. Hard-threshold network under all pressure conditions.

|                        | Drought | Cold | Heat | Salt | Wounding | UV  | Osmotic |
|------------------------|---------|------|------|------|----------|-----|---------|
| All chloroplast genes  | 179     | 786  | 666  | 545  | 231      | 801 | 1324    |
| Our network            | 139     | 762  | 508  | 526  | 165      | 720 | 1279    |
| Hard-threshold network | 119     | 742  | 447  | 513  | 145      | 697 | 1268    |

**Table S8.** The number of module genes remain in our network v.s. Hard-threshold network under all pressure conditions.

| Pressures | #Total Module Genes | Our Network | Hard-threshold Network |
|-----------|---------------------|-------------|------------------------|
| Drought   | 352                 | 292         | 251                    |
| Wounding  | 352                 | 305         | 253                    |
| Salt      | 704                 | 593         | 619                    |
| Heat      | 1233                | 1129        | 977                    |
| UV        | 1305                | 1259        | 1161                   |
| Cold      | 1308                | 1267        | 1226                   |

|         |      |      |      |
|---------|------|------|------|
| Osmotic | 1844 | 1825 | 1784 |
|---------|------|------|------|

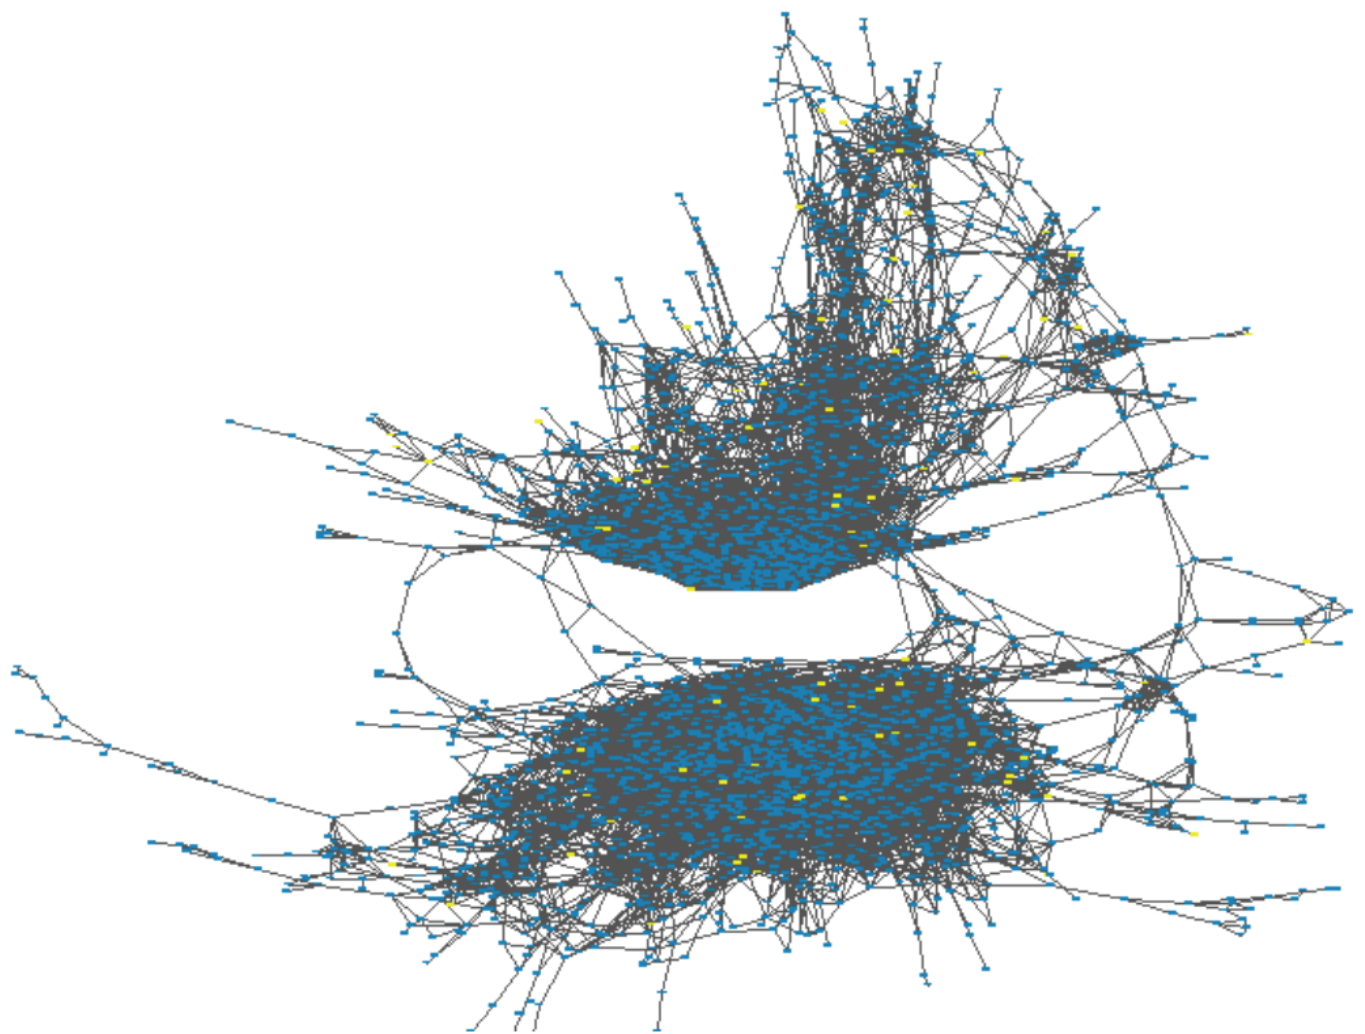

**Fig. (S1).** The major subnetworks of the mixed network of cold.



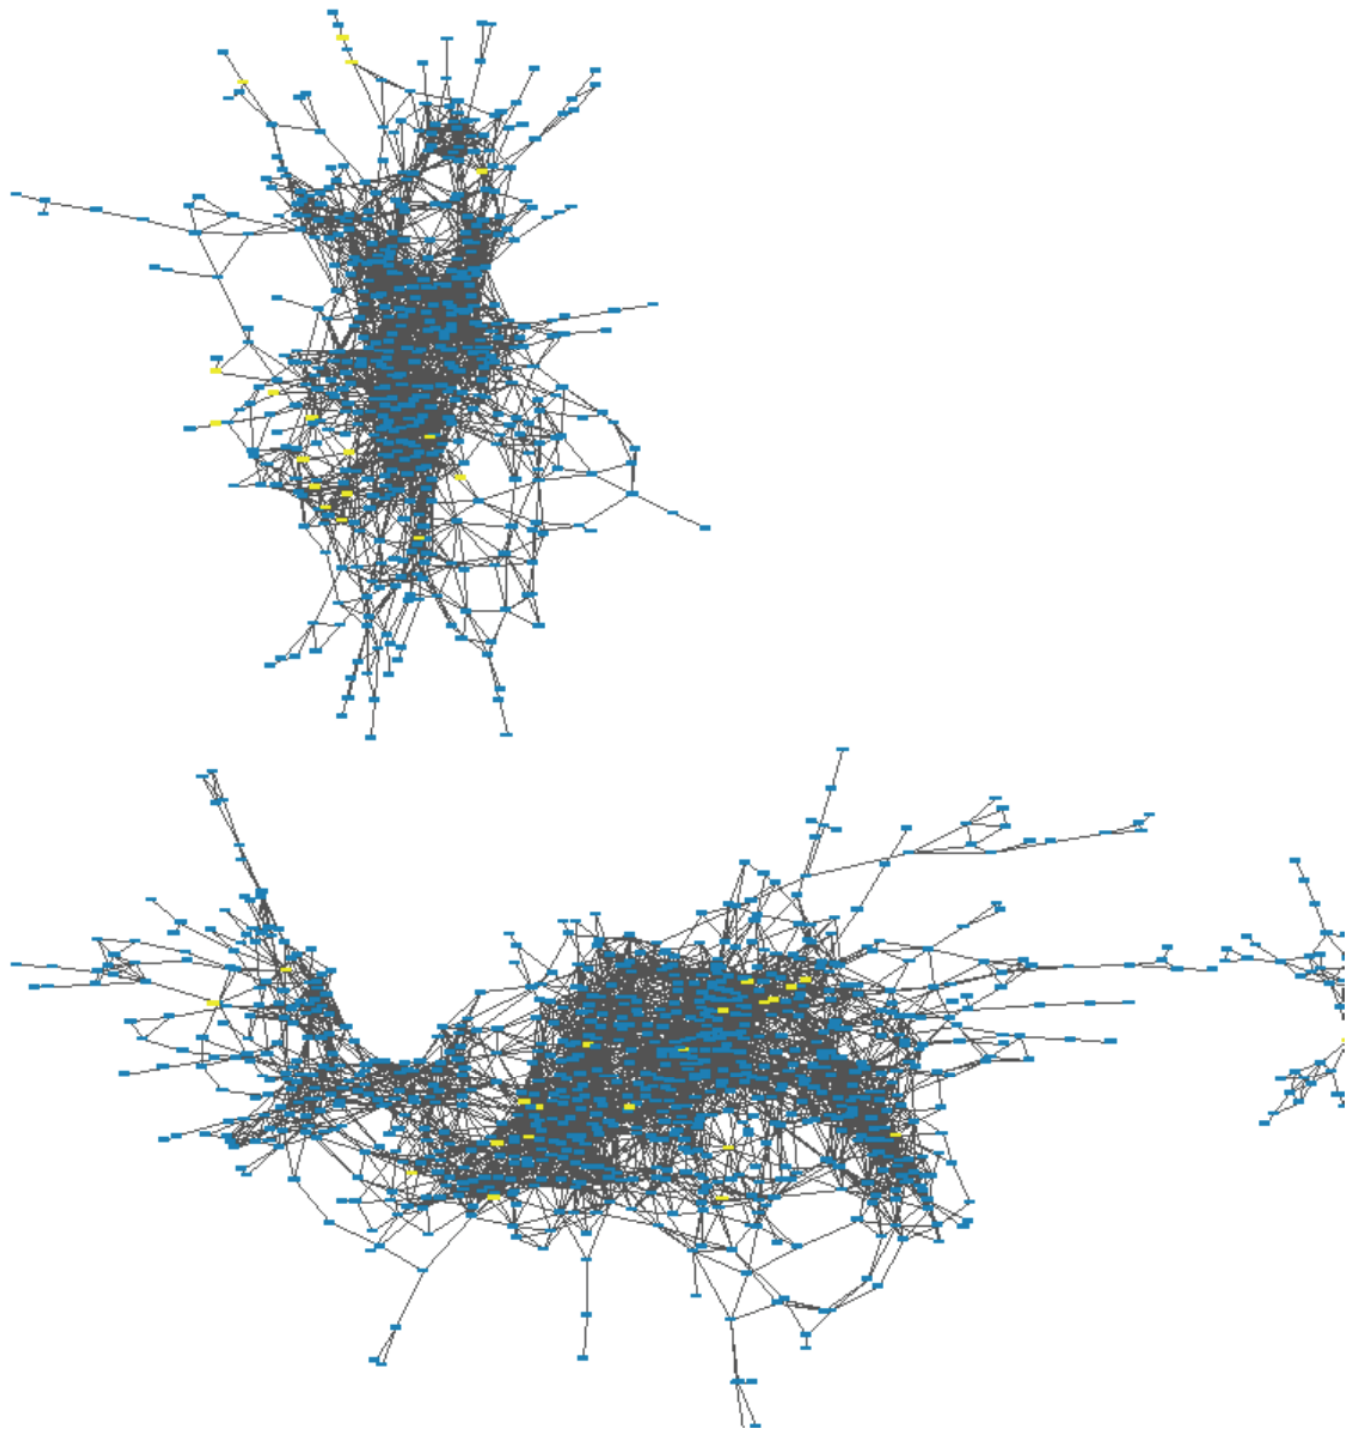

**Fig. (S2).** The major subnetworks of the mixed network of salt.

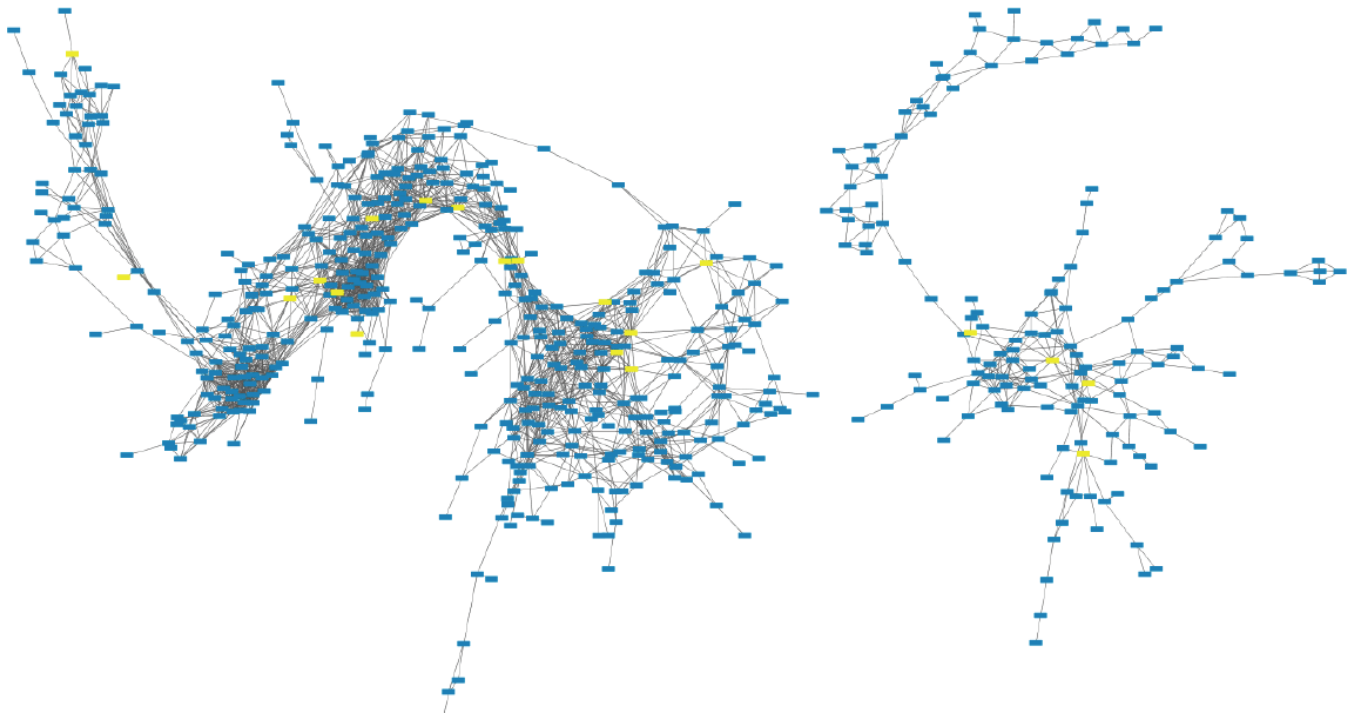

**Fig. (S3).** The major subnetworks of the mixed network of wounding.

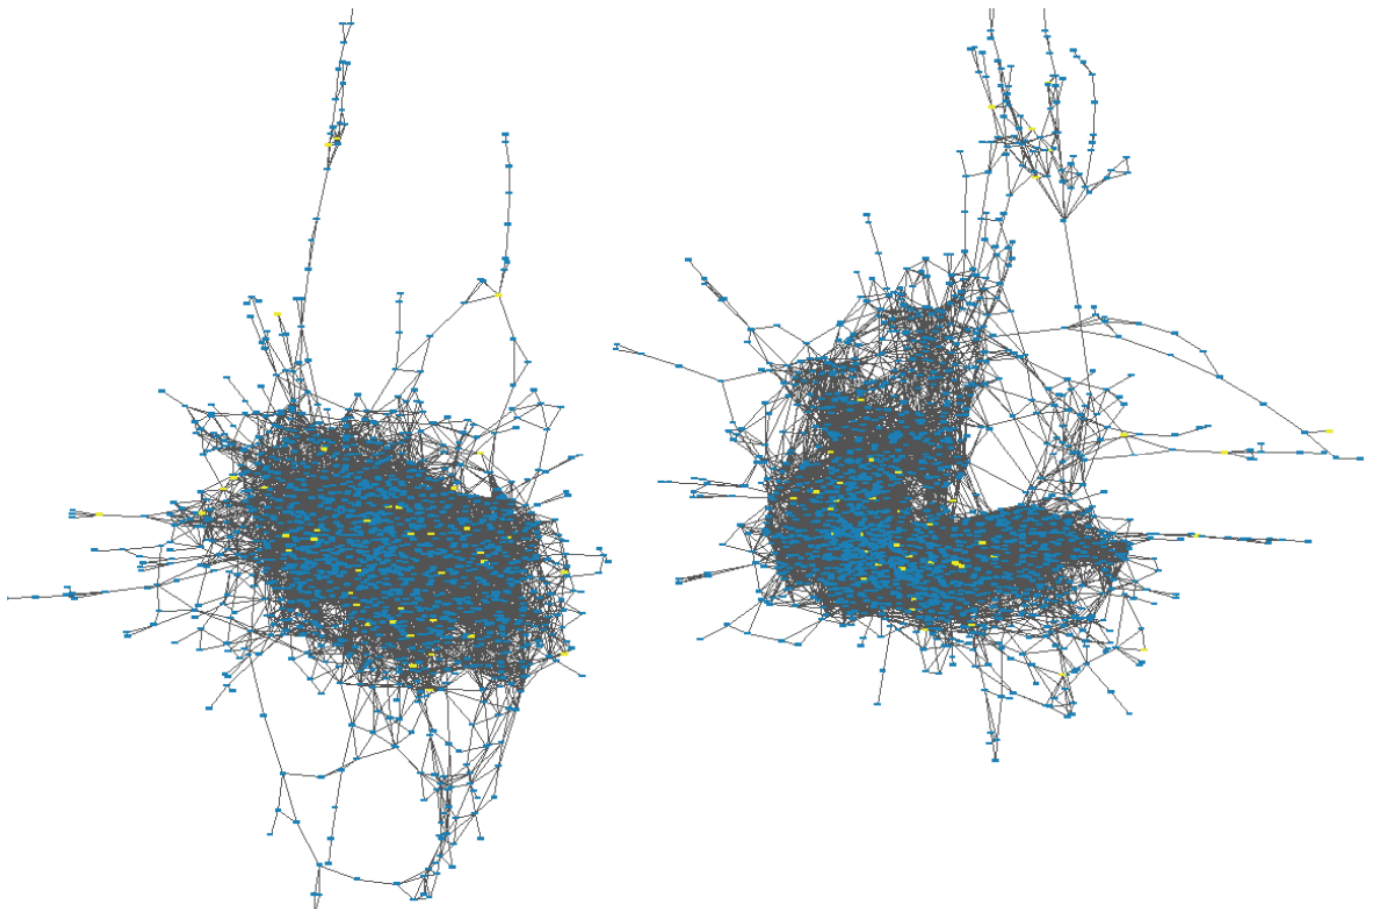

**Fig. (S4).** The major subnetworks of the mixed network of osmotic.

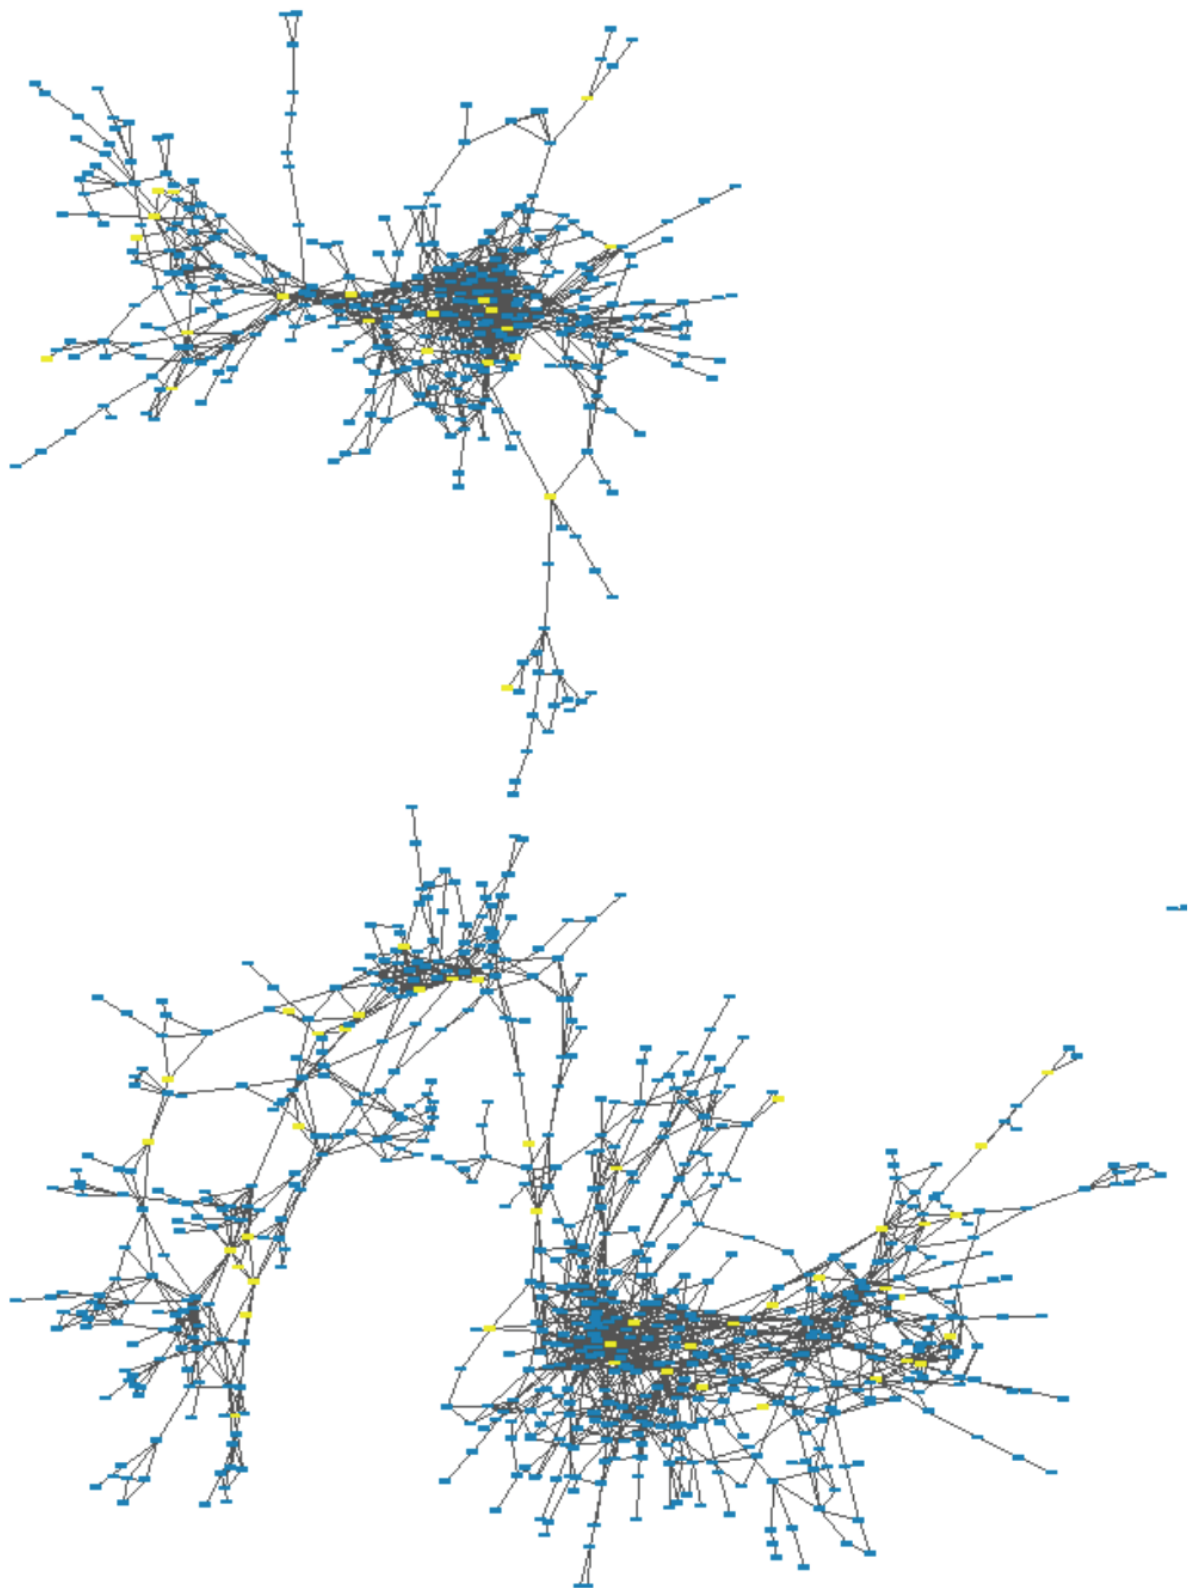

Fig. (S5). The major subnetworks of the mixed network of heat.

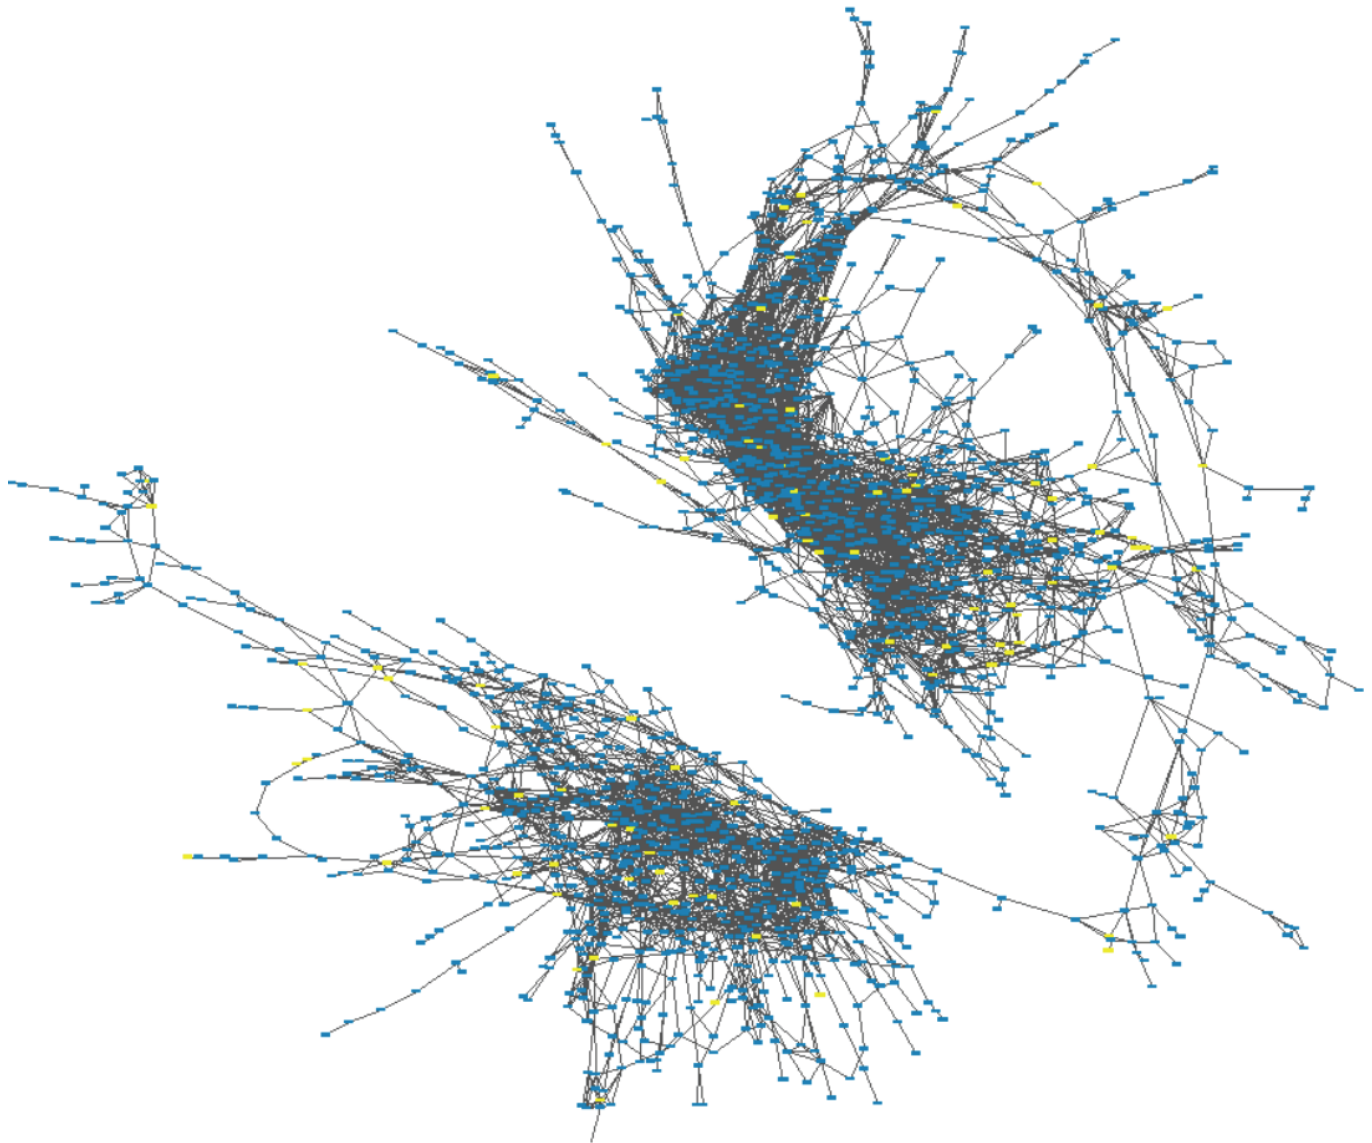

**Fig. (S6).** The major subnetworks of the mixed network of UV.

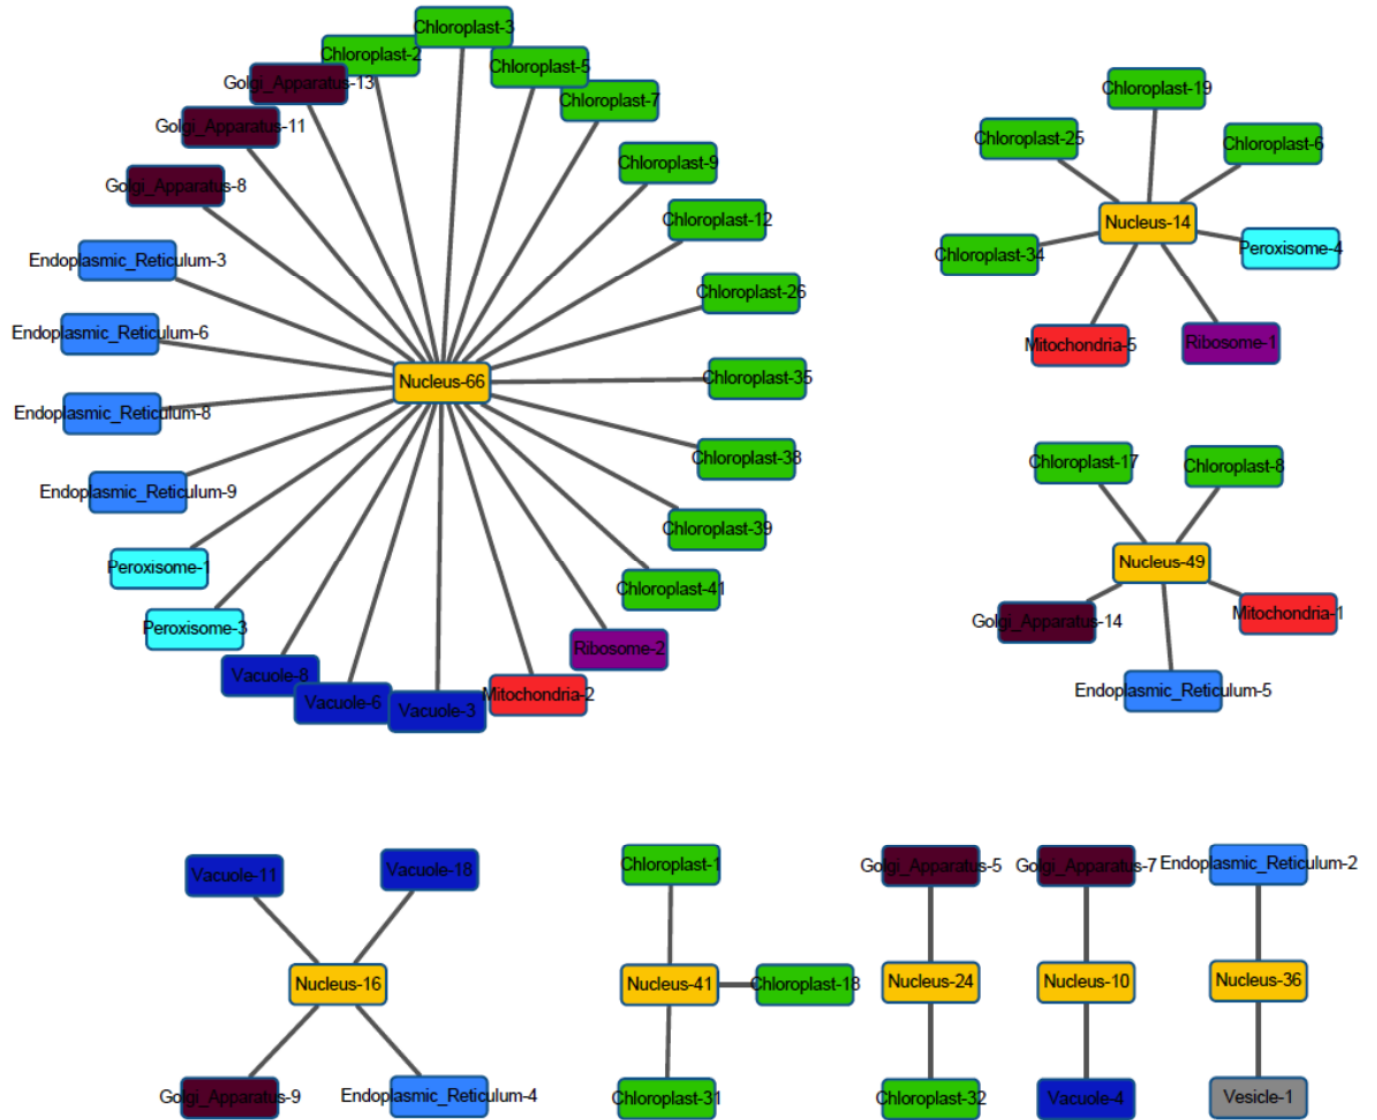

Fig. (S7). The network of functional modules of cold.

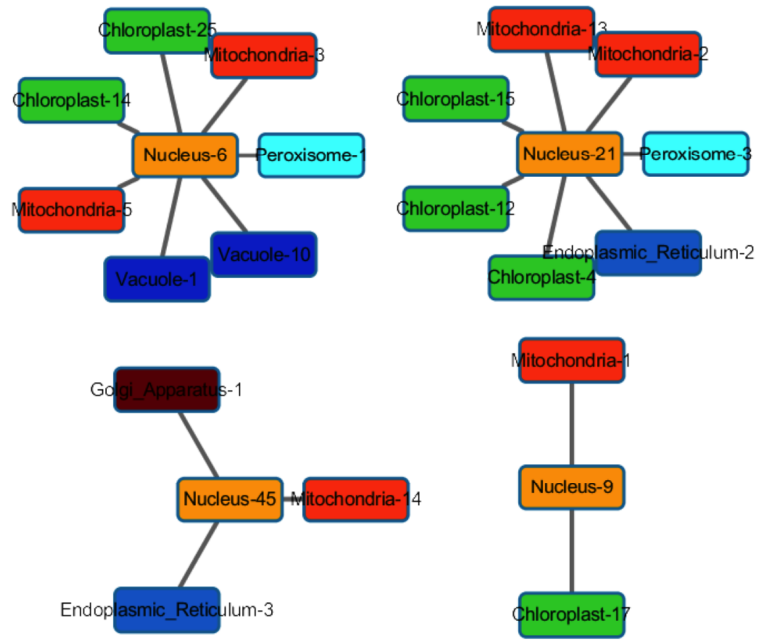

Fig. (S8). The network of functional modules of salt.

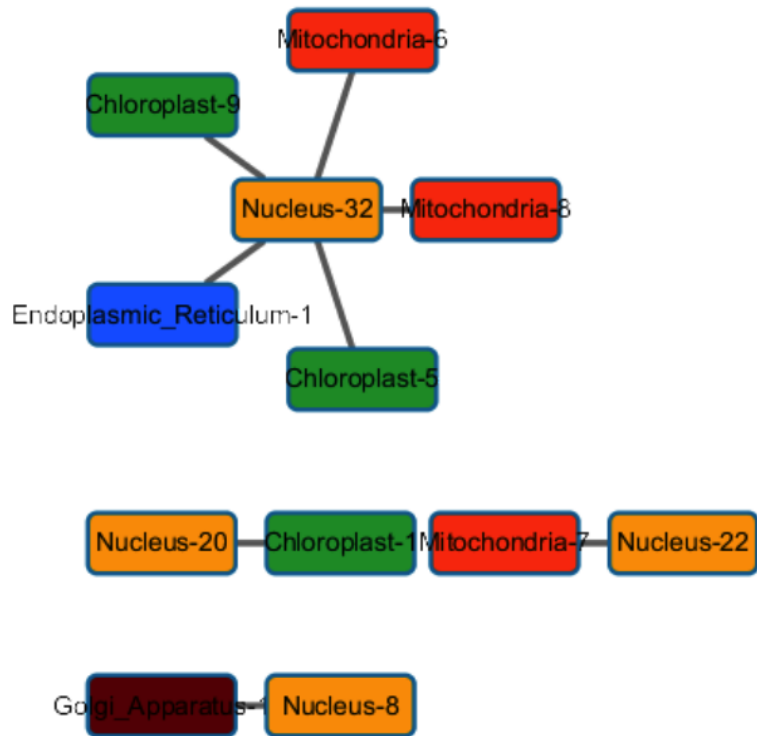

Fig. (S9). The network of functional modules of wounding.



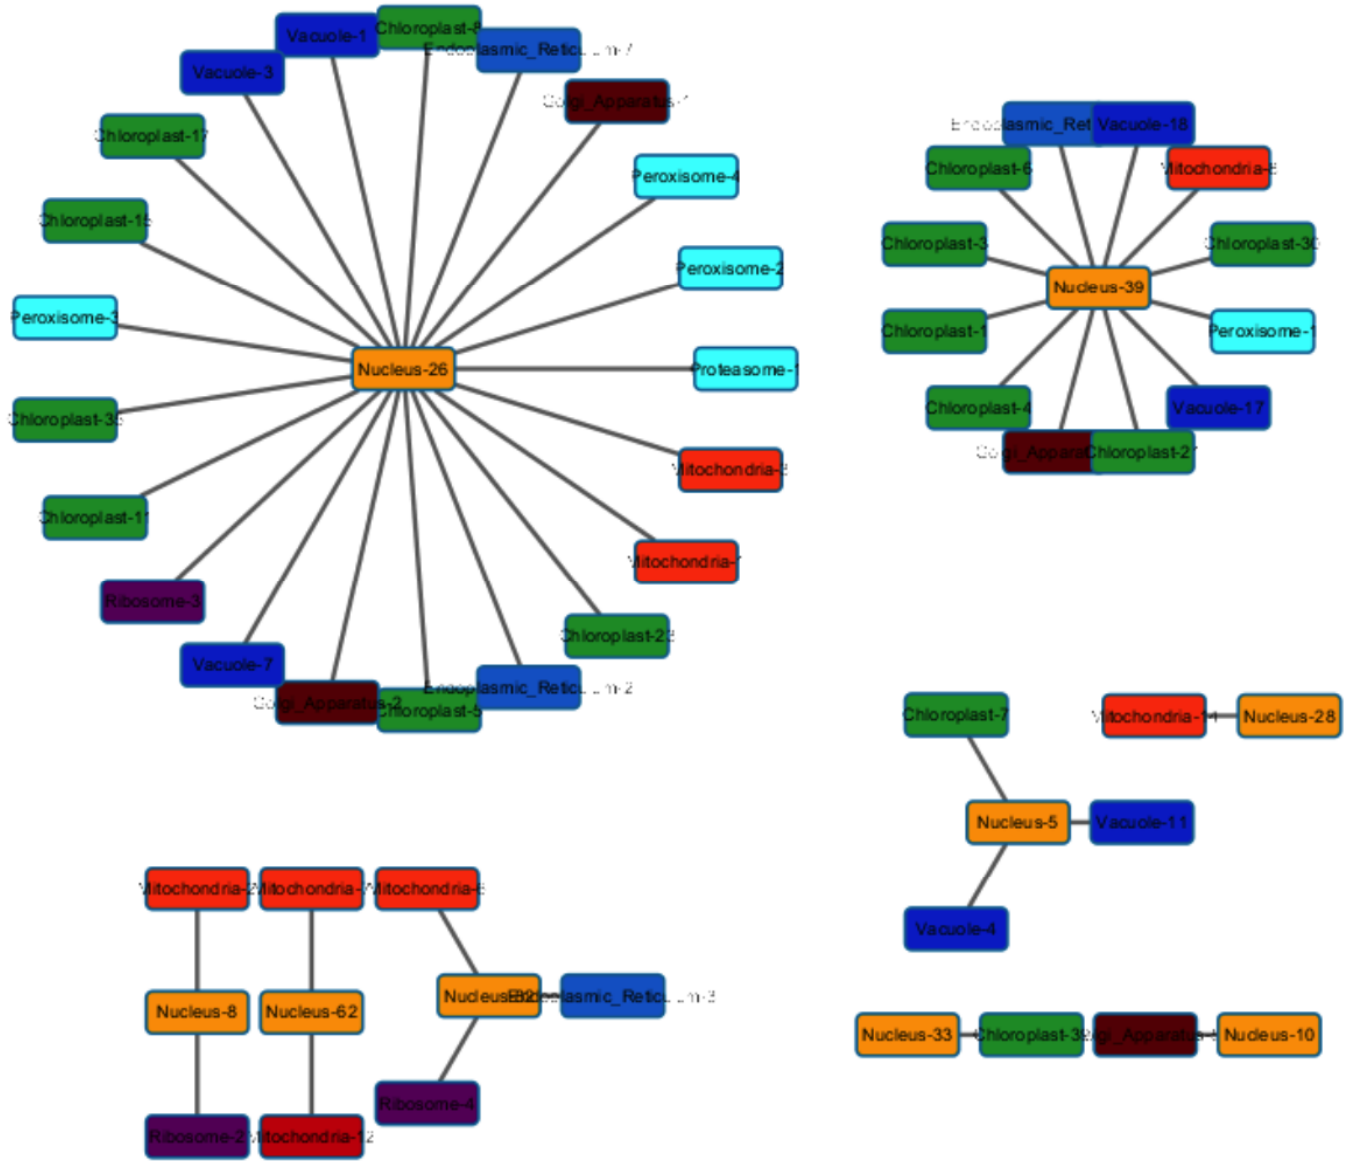

**Fig. (S12).** The network of functional modules of UV.
